1 Identification of essential genes in *Caenorhabditis elegans* through whole genome sequencing of  
2 legacy mutant collections

3

4 Erica Li-Leger<sup>\*</sup>, Richard Feichtinger<sup>†‡</sup>, Stephane Flibotte<sup>§</sup>, Heinke Holzkamp<sup>†\*\*</sup>, Ralf Schnabel<sup>‡</sup>,  
5 Donald G. Moerman<sup>\*</sup>

6

7 <sup>\*</sup>Department of Zoology, University of British Columbia, Vancouver, British Columbia, Canada

8 V6T 1Z3

9 <sup>†</sup>Present Address: Secufy GmbH, CoWorking M1, Anni-Eisler-Lehmannstr. 3, 55122 Mainz,

10 Germany

11 <sup>‡</sup>Department of Developmental Genetics, Institute of Genetics, Technische Universität

12 Braunschweig, 38106, Germany

13 <sup>§</sup>UBC/LSI Bioinformatics Facility, University of British Columbia, Vancouver, British Columbia,

14 Canada.

15 <sup>\*\*</sup>Present Address: Department of Biochemistry, Ludwig-Maximilians-University Munich, 81377

16 Munich, Germany

17 Short running title

18 Essential genes in *C. elegans*

19

20 Key words or phrases

- 21 • *C. elegans*
- 22 • Essential genes
- 23 • Maternal-effect
- 24 • Embryogenesis
- 25 • Fertilization
- 26 • Legacy mutants
- 27 • Whole genome sequencing

28

29 Corresponding author:

30 Name: Donald Moerman

31 Office mailing address including street name and number:

32 Department of Zoology

33 Life Sciences Centre

34 2350 Health Sciences Mall

35 Vancouver , B.C. Canada V6T 1Z3

36 Phone number: 604-822-3365

37 Email address: [moerman@zoology.ubc.ca](mailto:moerman@zoology.ubc.ca)

38

ABSTRACT

39  
40  
41  
42  
43  
44  
45  
46  
47  
48  
49  
50  
51  
52  
53  
54  
55  
56  
57  
58  
59  
60

It has been estimated that 15-30% of the ~20,000 genes in *C. elegans* are essential, yet many of these genes remain to be identified or characterized. With the goal of identifying unknown essential genes, we performed whole genome sequencing on complementation pairs from legacy collections of maternal-effect lethal and sterile mutants. This approach uncovered maternal genes required for embryonic development and genes with putative sperm-specific functions. In total, 58 essential genes were identified on chromosomes III, IV, and V, of which 49 genes are represented by novel alleles in this collection. Of these 49 genes, 19 (40 alleles) were selected for further functional characterization. The terminal phenotypes of embryos were examined, revealing defects in cell division, morphogenesis, and osmotic integrity of the eggshell. Mating assays with wild-type males revealed previously unknown male-expressed genes required for fertilization and embryonic development. The result of this study is a catalogue of mutant alleles in essential genes that will serve as a resource to guide further study toward a more complete understanding of this important model organism. As many genes and developmental pathways in *C. elegans* are conserved and essential genes are often linked to human disease, uncovering the function of these genes may also provide insight to further our understanding of human biology.

## INTRODUCTION

61  
62  
63 Essential genes are those required for the survival or reproduction of an organism, and therefore  
64 encode elements that are foundational to life. This class of genes has been widely studied for a  
65 number of reasons. Essential genes are often well conserved and can offer insight into the  
66 principles that govern common biological processes (Hughes 2002; Jordan *et al.* 2002; Georgi *et*  
67 *al.* 2013). Researching these genes and their functions has important implications in  
68 understanding the cellular and developmental processes that form complex organisms, including  
69 humans. Additionally, identifying genes that are lethal when mutated opens up new avenues  
70 through which drug development approaches can target parasites, pathogens, and cancer cells  
71 (for example, Doyle *et al.* 2010; Shi *et al.* 2015; Vyas *et al.* 2015; Zhang *et al.* 2018). Finally, the  
72 concept of a minimal gene set that is comprised of all genes necessary for life has been the  
73 subject of much investigation and has recently been of particular interest in the field of synthetic  
74 biology (reviewed in Ausländer *et al.* 2017).

75  
76 Studying essential genes in humans is complicated by practical and ethical considerations.  
77 Accordingly, model organisms have played a key role in identifying and understanding essential  
78 genes, and efforts have been made to identify all essential genes in a few model organisms.  
79 Systematic genome-wide studies of gene function in *Saccharomyces cerevisiae* have uncovered  
80 more than 1,100 essential genes, many of which have phylogenetically conserved roles in  
81 fundamental biological processes such as cell division, protein synthesis and metabolism  
82 (Winzeler *et al.* 1999; Giaever *et al.* 2002; Yu *et al.* 2006; Li *et al.* 2011). While an important  
83 contribution, this is only a fraction of the all the essential genes in multicellular organisms. In

84 more complex model organisms, identifying all essential genes in the genome has not been so  
85 straightforward. The discovery of RNA interference (RNAi; Fire *et al.* 1998) enabled researchers  
86 to employ genome-wide reverse genetic screens to examine the phenotypic effects of gene  
87 knockdown (Fraser *et al.* 2000; Kamath *et al.* 2003). In general, this has been an effective, high-  
88 throughput method for identifying many genes with essential functions (Gönczy *et al.* 2000;  
89 Sönnichsen *et al.* 2005). However, there are limitations to using RNAi to screen for all essential  
90 genes, including incomplete gene knock down, off-target effects, and RNAi resistance in certain  
91 tissue or cell types; thus, many genes of biological importance escape identification in high-  
92 throughput RNAi screens. This highlights the motivation to obtain null alleles for every gene in  
93 the genome, which has been the goal of several model organism consortia (C. elegans Deletion  
94 Mutant Consortium 2012; Bradley *et al.* 2012; Varshney *et al.* 2013), though it has not yet been  
95 achieved for any metazoan.

96  
97 *Caenorhabditis elegans* has been an important model in developmental biology for decades, and  
98 the ability to freeze and store populations of *C. elegans* indefinitely allows investigators to share  
99 their original mutant strains with others around the world. In the first few decades of *C. elegans*  
100 research, dozens of forward genetics screens were used to uncover mutants in hundreds of  
101 essential genes (for example, Herman 1978; Meneely and Herman 1979; Rogalski *et al.* 1982;  
102 Howell *et al.* 1987; Clark *et al.* 1988; Johnsen and Baillie 1988; Kempfues *et al.* 1988; McKim *et*  
103 *al.* 1988; Howell and Rose 1990; Johnsen and Baillie 1991; McKim *et al.* 1992; Stewart *et al.*  
104 1998; Gönczy *et al.* 1999). These early studies generated what we refer to here as legacy  
105 collections. The alleles were often mapped to a region of the genome through deficiency or

106 linkage mapping. However, the process of identifying the molecular nature of the genetic  
107 mutations one-by-one using traditional methods was slow and laborious before the genome  
108 sequence was complete (The *C. elegans* Sequencing Consortium 1998) and next-generation  
109 sequencing technologies were developed (reviewed in Metzker 2010; Goodwin *et al.* 2016).  
110  
111 As whole genome sequencing (WGS) has become widely adopted, methods for identifying  
112 mutant alleles have evolved to take advantage of these technological advances (Sarin *et al.* 2008;  
113 Smith *et al.* 2008; Srivatsan *et al.* 2008; Blumenstiel *et al.* 2009; Schneeberger *et al.* 2009;  
114 Doitsidou *et al.* 2010; Flibotte *et al.* 2010; Zuryn *et al.* 2010; Smith *et al.* 2016). With WGS  
115 becoming increasingly affordable over time, mutant collections can now be mined for data in  
116 efficient ways that were not possible two decades ago. Performing WGS on a single mutant  
117 genome is often insufficient to identify a causal variant due to the abundance of background  
118 mutations in any given strain, particularly one that has been subjected to random mutagenesis  
119 (Denver *et al.* 2004; Hillier *et al.* 2008; Sarin *et al.* 2008; Flibotte *et al.* 2010). However, when  
120 paired with additional strategies such as deletion or SNP-based mapping or bulk segregant  
121 analysis, WGS becomes a valuable tool to expedite gene identification. Furthermore, if multiple  
122 independently derived allelic mutants exist, an even simpler approach can be taken. By  
123 sequencing two or more mutants within a complementation group and looking for mutations in  
124 the same gene, the need for additional mapping or crossing schemes is greatly reduced  
125 (Schneeberger *et al.* 2011; Nordström *et al.* 2013).  
126

127 In the legacy mutant collections described above, where large numbers of mutants are isolated,  
128 it is feasible to obtain complementation groups with multiple alleles for many loci. In addition,  
129 the abundance of mutants obtained in these large-scale genetic screens suggests that some  
130 legacy mutant collections may harbor strains for which the mutations remain unidentified. If  
131 such collections are coupled with thorough annotations, they are valuable resources that can be  
132 mined with WGS. Indeed, some investigators have recently used such WGS-based approaches to  
133 uncover novel essential genes from legacy collections (Jaramillo-Lambert *et al.* 2015; Qin *et al.*  
134 2018). These projects bring us closer to identifying all essential genes in *C. elegans* and also  
135 contribute to the ongoing efforts to obtain null mutations in every gene in the genome.

136

137 There are currently 3,755 *C. elegans* genes that have been annotated with lethal or sterile  
138 phenotypes from RNAi knockdown studies (data from WormBase version WS275). In  
139 comparison, the number of genes currently represented by lethal or sterile mutant alleles is  
140 1,885 (data from WormBase version WS275). These numbers should be considered minimums,  
141 as the database annotations are not necessarily up to date. The discrepancy in these numbers  
142 could be illustrative of the comparatively time-consuming and laborious nature of isolating and  
143 identifying mutants. Additionally, some of the genes identified as essential in RNAi screens may  
144 belong to paralogous gene families whose redundant functions are masked in single gene  
145 knockouts. Although the total number of essential genes in *C. elegans* is unknown, extrapolation  
146 from saturation mutagenesis screens has led to estimates that approximately 15-30% of the  
147 ~20,000 genes in this organism are essential (Clark *et al.* 1988; Howell and Rose 1990; Johnsen  
148 and Baillie 1997; The *C. elegans* Deletion Mutant Consortium 2012). This suggests the possibility

149 that there are many essential genes in *C. elegans* that remain unidentified and/or lack  
150 representation by a null allele.  
151  
152 In this study, we use WGS to revisit two *C. elegans* legacy mutant collections isolated more than  
153 25 years ago. These collections are a rich resource for essential gene discovery; they comprise 75  
154 complementation groups in which at least two alleles with sterile or maternal-effect lethal  
155 phenotypes have been found. With these collections, we sought to identify novel essential genes  
156 and to conduct a preliminary characterization of their roles in fertilization and development.  
157 Wild-type male rescue assays are used to attribute some mutant phenotypes to sperm-specific  
158 genetic defects. In addition, we examine arrested embryos using differential interference  
159 contrast (DIC) microscopy and document their terminal phenotypes. This work comprises a  
160 catalogue of 123 alleles with mutations in 58 essential genes on chromosomes III, IV, and V. Of  
161 these 58 genes, 49 are represented by novel alleles in this collection. We present several genes  
162 which are reported here for the first time as essential genes and mutant alleles for genes that  
163 have only previously been studied with RNAi knockdown. The aim of this work is to help  
164 accelerate research efforts by identifying essential genes and providing an entry point into  
165 further investigations of gene function. Advancing our understanding of essential genes is  
166 imperative to reaching a more comprehensive knowledge of gene function in *C. elegans* and may  
167 provide insight into conserved processes in developmental biology, parasitic nematology, and  
168 human disease.



169 MATERIALS AND METHODS

170

171 **Generation of legacy mutant collections**

172 Mutant strains were isolated in screens for maternal-effect lethal and sterile alleles in the early

173 1990s by Heinke Holzkamp and Ralf Schnabel (unpublished data), and Richard Feichtinger

174 (Feichtinger 1995). Two balancer strains were used for mutagenesis; GE1532: *unc-32(e189)/qC1*

175 [*dpy-19(1259) glp-1(q339)*] III; *him-3(e1147)* IV and GE1550: *him-9(e1487)* II; *unc-*

176 *24(e138)/nT1[let(m435)]* IV; *dpy-11(e224)/nT1[let(m435)]* V. These parental strains were

177 subjected to ethyl methanesulfonate (EMS) mutagenesis at 20° as described by Brenner (1974),

178 with a mutagen dose of 50-75 mM and duration between 4 and 6 hours. Following mutagenesis,

179 L4 F1 animals were singled on plates at either 15° or 17°. Animals with homozygous markers in

180 the F2 or F3 generation were transferred to 25° and subsequently screened for the production of

181 dead eggs, unfertilized oocytes, or no eggs laid. The two mutant collections analyzed in this

182 study are summarized in Table 1.

183

184

185 **List of strains**

186 The wild-type Bristol N2 derivative PD1074 and strains with the following mutations were used:

187 *him-3(e1147)*, *unc-32(e189)*, *qC1[dpy-19(e1259) glp-1(q339)]*, *him-9(e1487)*, *unc-24(e138)*, *dpy-*

188 *11(e224, e1180)*, *nT1[let(m435)]* (IV;V), *nT1[unc(n754)let]* (IV;V). Strains carrying the following

189 deletions were used for deficiency mapping: *nDf16*, *nDf40*, *sDf110*, *sDf125*, *tDf5*, *tDf6*, *tDf7* (III);

190 *eDf19*, *nDf41*, *sDf2*, *sDf21*, *stDf7* (IV); *ctDf1*, *itDf2*, *nDf32*, *sDf28*, *sDf35* (V). All *sDfs* were kindly

191 provided by D. Baillie's Lab (Simon Fraser University), and some strains were kindly provided by

192 the Caenorhabditis Genetics Center (University of Minnesota). Nematode strains were cultured  
193 as previously described by Brenner (1974).

194  
195

### 196 **Outcrossing, mapping and complementation analysis**

197  
198

199 All mutant strains were outcrossed at least once to minimize background mutations on other  
200 chromosomes. Hermaphrodites of the mutant strains were outcrossed with males of GE1532 for  
201 Collection A and males of GE1964: *him-9(e1487) II; +/nT1[let(m435)] IV; dpy-*  
202 *11(e1180)/nT1[let(m435)] V* for Collection B. Deficiency mapping was used to localize mutations  
203 to a chromosomal region using the deletion strains listed above. A detailed description of the  
204 outcrossing and mapping schemes for Collection B can be found in Feichtinger (1995).

205

206 Complementation analysis of legacy mutants was performed by crossing 10 males of one mutant  
207 strain to 4 hermaphrodites of another strain. The presence of males with homozygous markers  
208 indicated successful crossing, and homozygous hermaphrodite progeny were transferred to new  
209 plates to determine whether viable offspring were produced and thus complementation  
210 occurred. Failure to complement was verified with additional homozygous animals or by  
211 repeating the cross. Complementation tests between CRISPR-Cas9 deletion strains and legacy  
212 mutants were performed by crossing heterozygous CRISPR-Cas9 deletion (GFP/+) males to  
213 heterozygous legacy mutant hermaphrodites. Twenty GFP hermaphrodite F1s were singled on  
214 new plates and those segregating viable Dpy and/or Unc progeny indicated complementation  
215 between the two alleles.

216

217

## 218 DNA extraction

219

220 Balanced heterozygous strains were grown on 100 mm nematode growth medium (NGM) agar  
221 plates (standard recipe with 3 times concentration of peptone) seeded with OP50 and harvested  
222 at starvation. Genomic DNA was extracted using a standard isopropanol precipitation technique  
223 previously described (Au *et al.* 2019). DNA quality was assessed with a NanoDrop 2000c  
224 Spectrophotometer (Thermo Scientific) and DNA concentration was measured using a Qubit 2.0  
225 Fluorometer and dsDNA Broad Range Assay kit (Life Technologies).

226

## 227 Whole genome sequencing and analysis pipeline

228 DNA library preparation and whole genome sequencing were carried out by The Centre for  
229 Applied Genomics (The Hospital for Sick Children, Toronto, Canada). Between 20 and 33 *C.*  
230 *elegans* mutant strains were run together on one lane of an Illumina HiSeq X to generate 150-bp  
231 paired-end reads.

232

233 Sequencing analysis was done using a modified version of a previously designed custom pipeline  
234 (Flibotte *et al.* 2010; Thompson *et al.* 2013). Reads were aligned to the *C. elegans* reference  
235 genome (WS263; [wormbase.org](http://wormbase.org)) using the short-read aligner BWA version 0.7.16 (Li and Durbin  
236 2009). Single nucleotide variants (SNVs) and small insertions or deletions (indels) were called  
237 using SAMtools toolbox version 1.6 (Li *et al.* 2009). To eliminate unreliable calls, variants at  
238 genomic locations for which the canonical N2 strain has historically had low read depth or poor  
239 quality (Thompson *et al.* 2013) were removed as potential candidates. The variant calls were  
240 annotated with a custom Perl script and labeled heterozygous if represented by 20-80% of the

241 reads at that location. The remaining candidates were then subjected to a series of custom  
242 filters. Any variants that appeared in more than three strains from the same collection were  
243 removed. The remaining list was filtered to only include heterozygous mutations affecting coding  
244 exons (indels, missense and nonsense mutations) and splice sites (defined as the first two and  
245 last two base pairs in an intron). Finally, the list of candidate mutations was trimmed to include  
246 only mutations on the chromosome to which the mutation had originally been mapped.

247

248 For each pair of strains belonging to a complementation group, the final list of candidate  
249 mutations was compared and the gene or genes in common were identified. In cases where  
250 there was only one gene in common on both lists, this gene was designated the candidate  
251 essential gene. For complementation groups with multiple candidate genes in common,  
252 additional information such as the nature of the mutations and existing knowledge about the  
253 genes was used to select a single candidate gene, when possible. When there was no gene  
254 candidate in common within a pair of strains, the list of variants was reanalyzed to look for larger  
255 deletions and rearrangements. If available, two additional alleles were sequenced to help  
256 identify the gene.

257

### 258 **Validation of gene identities**

259 To validate the candidate gene identities derived from whole genome sequencing analysis, the  
260 genomic position of each candidate gene was corroborated with the legacy data from deficiency  
261 mapping experiments. Approximate boundaries for the deletions were estimated from the map

262 coordinates of genes known to lie internal or external to the deletions according to data from  
263 WormBase (WS275).  
264  
265 For further validation of select gene candidates, deletion mutants were generated in an N2 wild-  
266 type background using a CRISPR-Cas9 genome editing strategy previously described (Norris *et al.*  
267 2015; Au *et al.* 2019). Two guide RNAs were used to excise the gene of interest and replace it  
268 with a selection cassette expressing G418 drug resistance and pharyngeal GFP (*loxP* + *Pmyo-*  
269 *2::GFP::unc-54* 3'UTR + *Prps-27::neoR::unc-54*3'UTR + *loxP* vector, provided by Dr. John Calarco,  
270 University of Toronto, Canada). Guide RNAs were designed using the *C. elegans* Guide Selection  
271 Tool ([genome.sfu.ca/crispr](http://genome.sfu.ca/crispr)) and synthesized by Integrated DNA Technologies (IDT). Repair  
272 templates were generated by assembling homology arms (450-bp gBlocks synthesized by IDT)  
273 and the selection cassette using the NEBuilder Hifi DNA Assembly Kit (New England Biolabs).  
274  
275 Cas9 protein (generously gifted from Dr. Geraldine Seydoux) was assembled into a  
276 ribonucleoprotein (RNP) complex with the guide RNAs and tracrRNA (IDT) following the  
277 manufacturer's recommendations. PD1074 animals were injected using standard microinjection  
278 techniques (Mello *et al.* 1991; Kadandale *et al.* 2009) with an injection mix consisting of: 50 ng/ $\mu$ l  
279 repair template, 0.5  $\mu$ M RNP complex, 5 ng/ $\mu$ l pCFJ104 (*Pmyo-3::mCherry*), and 2.5 ng/ $\mu$ l pCFJ90  
280 (*Pmyo-2::mCherry*). Injected animals were screened according to the protocol described in  
281 Norris *et al.* (2015) and genomic edits were validated using the PCR protocol described in Au *et*  
282 *al.* (2019). Complementation tests between CRISPR-Cas9 alleles and legacy mutant alleles were  
283 performed to verify gene identities, as described above.

284

285 **Analysis of orthologs, gene ontology, and expression patterns**

286 Previously reported phenotypes from RNAi experiments or mutant alleles were retrieved from  
287 WormBase (WS275) and GExplore ([genome.sfu.ca/gexplore](http://genome.sfu.ca/gexplore); Hutter *et al.* 2009; Hutter and Suh  
288 2016). Life stage-specific gene expression data from the modENCODE project (Hillier *et al.* 2009;  
289 Gerstein *et al.* 2010, 2014; Boeck *et al.* 2016) were also accessed through GExplore. Visual  
290 inspection of these data revealed genes with maternal expression patterns (high levels of  
291 expression in the early embryo and hermaphrodite gonad) as well as those predominantly  
292 expressed in males.

293

294 Human orthologs of *C. elegans* genes were determined using Ortholist 2 ([ortholist.shaye-lab.org](http://ortholist.shaye-lab.org);  
295 Kim *et al.* 2018). For maximum sensitivity, the minimum number of programs predicting a given  
296 ortholog was set to one. NCBI BLASTp ([blast.ncbi.nlm.nih.gov](http://blast.ncbi.nlm.nih.gov); Altschul *et al.* 1990) was used to  
297 examine distributions of homologs across species and potential nematode-specificity in genes  
298 with no human orthologs. Protein sequences from the longest transcript of each gene were used  
299 to query the non-redundant protein sequences (nr) database, with default parameters and a  
300 maximum of 1,000 target sequences. The results were filtered with an E-value threshold of  $10^{-5}$ .

301

302 Gene Ontology (GO) term analysis was performed using PANTHER version 16.0 (Thomas *et al.*  
303 2003). The list of 58 candidate genes was used for an overrepresentation test, with the set of all  
304 *C. elegans* genes as a background list. Overrepresentation was analyzed with a Fisher's Exact test  
305 and p-values were adjusted with the Bonferroni multiple testing correction.

306

### 307 **Temperature sensitivity and mating assays**

308 To assay temperature sensitivity, heterozygous strains were propagated at 15° and homozygous  
309 L4 animals were isolated on 60 mm NGM plates (2 x 6/plate or 3 x 3/plate). After one week at  
310 15°, plates were screened for the presence of viable homozygous progeny. If present, L4  
311 homozygotes were transferred to new plates at 25° and screened after three days to confirm  
312 lethality or sterility.

313

314 Mating assays were carried out using PD1074 males and mutant hermaphrodites. Three L4-stage  
315 homozygous mutant hermaphrodites were isolated and crossed with ten PD1074 males on each  
316 of three 60 mm NGM plates. Control plates consisted of three L4 hermaphrodite mutants  
317 without males. Mating assays were carried out at 25°C and observations were taken after three  
318 days, noting the absence or presence of viable cross progeny.

319

### 320 **Microscopy**

321 The terminal phenotypes of dead eggs from maternal-effect lethal mutants were observed using  
322 DIC microscopy. Young adult homozygous mutants were dissected to release their eggs in either  
323 M9 buffer with Triton X-100 (0.5%; M9+TX) or distilled water and embryos were left to develop  
324 at 25°C overnight (~16 hours). Embryos were mounted on 2% agarose pads and visualized using  
325 a Zeiss Axioplan 2 equipped with DIC optics. Images of representative embryos were captured  
326 using a Zeiss AxioCam 105 Color camera and ZEN 2.6 imaging software (Carl Zeiss Microscopy).  
327 For embryos incubated in distilled water, an osmotic integrity defective (OID) phenotype was

328 noted for embryos that burst or swelled and filled the eggshell, as described by Sönnichsen *et al.*  
329 (2005).

330

331 **Data availability**

332 The raw sequence data from this study have been deposited in the NCBI Sequence Read Archive

333 (SRA; [ncbi.nlm.nih.gov/sra](https://ncbi.nlm.nih.gov/sra)) under accession number PRJNA628853. Supplemental material is

334 available at Figshare. File S1 contains sequences and associated information for CRISPR-Cas9

335 deletion alleles. File S2 contains life stage-specific expression patterns for the Genes of Interest.

336 File S3 contains documentation of the terminal phenotypes for maternal-effect lethal embryos.



337  
338  
339  
340  
341  
342  
343  
344  
345  
346  
347  
348  
349  
350  
351  
352  
353  
354  
355  
356  
357

## RESULTS

### Identification of 58 essential genes

Whole genome sequencing was performed on a total of 157 strains, with depth of coverage ranging between 21x and 65x (average = 38x). A minimum of two alleles for each of 75 complementation groups were sequenced and a total of 58 essential genes were identified (Table 2). Literature searches revealed that 43 of these genes have been annotated with lethal or sterile phenotypes from either mutant alleles or RNAi studies. Furthermore, 17 of the 157 alleles had been previously sequenced (Vatcher *et al.* 1998; Gönczy *et al.* 2001; Kaitna *et al.* 2002; Brauchle *et al.* 2003; Cockell *et al.* 2004; Delattre *et al.* 2004; Sonnevile *et al.* 2004; Bischoff and Schnabel 2006; Nieto *et al.* 2010), and therefore served as a blind test set to validate our analysis approach. Eight of the nine genes represented in this blind test set were correctly identified by our pipeline, whereas one gene escaped identification. This was due to an intronic mutation that did not pass our filtering criteria but was found upon manual inspection of the sequencing data. While the list of 58 genes includes many known essential genes, among the known genes are alleles that are novel genetic variants. Nineteen genes from this collection which were not previously studied or were not represented by lethal or sterile mutants were designated Genes of Interest (GOI; Table 3). These 19 GOI, represented by 40 alleles, were further characterized as part of this study. They include 14 genes (28 alleles) with a maternal-effect lethal phenotype and 5 genes (12 alleles) with a sterile phenotype.

### Validation of candidate gene assignments

358 After isolation, the mutant alleles were each localized to a chromosomal region through  
359 deficiency mapping. This data was used to corroborate the candidate gene identities derived  
360 from WGS analysis and to resolve complementation groups with more than one gene candidate.  
361 For the majority of complementation groups, the genomic position of the assigned gene was in  
362 agreement with the deficiency genetic mapping data (Figure 1).

363

364 There were some conflicts between the deficiency mapping data and the gene candidates  
365 proposed through WGS analysis. Three complementation groups that were found to not map  
366 under any of the tested deficiencies were assigned gene candidates whose genomic coordinates  
367 fall into regions covered by the tested deficiencies (alleles of *bckd-1A*, *top-3*, and *unc-112*; Figure  
368 1). In addition, two of these groups were assigned the same gene identity as another,  
369 purportedly distinct, complementation group (Table 4). From WGS analysis, *bckd-1A* was the  
370 initial gene candidate for two different complementation groups, yet only one of these groups  
371 had been mapped to a deletion (*tDf5*) that covers the *bckd-1A* locus. Similarly, *top-3* was the  
372 assigned gene candidate for three different complementation groups, only one of which was  
373 mapped under a deficiency (*tDf5*) encompassing that gene. By performing complementation  
374 tests with select alleles (Table 4), we concluded that the two *bckd-1A* groups are not distinct, and  
375 indeed they contain mutations in the same gene. One of the groups (gene-35) originally  
376 identified as *top-3* is a double mutant which fails to complement gene-15 (*top-3*) and gene-34  
377 (unknown gene).

378

379 Three candidate genes (*nstp-2*, *C34D4.4* and *F56D5.2*) were selected for additional validation by  
380 generating a deletion of the gene in a wild-type background using CRISPR-Cas9 genome editing  
381 (Norris *et al.* 2015; Au *et al.* 2019). These genes were chosen because they were expected to be  
382 of interest to the broader research community. The deletion alleles have been verified with the  
383 PCR protocol described by Au *et al.* (2019). Guide RNA sequences and deletion-flanking  
384 sequences are listed in Supplementary Table S1. Complementation testing between the newly  
385 generated CRISPR-Cas9 deletion mutants and the legacy mutant strains confirmed that the  
386 mutations are allelic, and the genes assigned to the legacy strains are correct (Supplementary  
387 Table S1)

388

### 389 Human orthologs, gene ontology, and expression patterns

390 Of the 58 essential genes identified, 47 genes have predicted human orthologs (Table 2). Many  
391 of these genes in humans have been implicated in disease and are associated with OMIM disease  
392 phenotypes (Online Mendelian Inheritance in Man; [omim.org](http://omim.org)). BLASTp searches revealed that  
393 the set of 19 GOI contains three nematode-specific genes (*F56D5.2*, *perm-5*, and *T22B11.1*) that  
394 have homologs in parasitic species, and two uncharacterized genes (*D2096.12* and *Y54G2A.73*)  
395 that do not have significant homology outside the *Caenorhabditis* genus.

396

397 To gain insight into the functions of the identified essential genes, an overrepresentation test  
398 was used to elucidate the most prominent gene ontology (GO) terms associated with them. The  
399 Biological Process terms overrepresented in the set of 58 essential genes include such terms as  
400 organelle organization (GO:0006996), nuclear division (GO:0000280), cellular metabolic process

401 (GO:0044237), and DNA repair (GO:0006281), as shown in Figure 2. In the Molecular Function  
402 category, binding (GO:0005488) and catalytic activity (GO:0003824) are overrepresented by 41  
403 genes (adjusted  $p=1.2E-07$ ) and 28 genes (adjusted  $p=1.8E-03$ ), respectively.

404

405 To examine the timing of gene expression throughout the life cycle, gene expression data from  
406 the modENCODE project (Hillier *et al.* 2009; Gerstein *et al.* 2010, 2014; Boeck *et al.* 2016) was  
407 retrieved from GExplore ([genome.sfu.ca/gexplore](http://genome.sfu.ca/gexplore); Hutter *et al.* 2009; Hutter and Suh 2016) for  
408 the 19 GOI (Supplementary Appendix S2). These data show a U-shaped expression pattern for  
409 ten of the GOI, with high expression occurring in the early embryonic stages as well as in  
410 adulthood, and particularly in the hermaphrodite gonad. This U-shaped pattern is characteristic  
411 of a maternal-effect gene, for which gene products are passed on to the embryo from the  
412 parent. Five genes have a maternal gene expression pattern as well as expression throughout  
413 other stages of the life cycle, indicating an additional, zygotic role for the gene. Seven genes have  
414 elevated expression levels in males and L4-stage hermaphrodites. These genes are suspected to  
415 be involved in sperm production or fertilization, and the associated strains were subjected to  
416 mating assays (see below).

417

#### 418 **Temperature sensitivity and mating assays for genes of interest**

419 The 40 alleles associated with the 19 GOI were further examined to gain insight into the  
420 phenotypic consequences of their mutations. Each allele was assayed for temperature  
421 sensitivity, as some of the original mutant screening was carried out at 25°C. Five alleles (marked  
422 with a [ts] phenotype in Table 3) were deemed temperature sensitive and could proliferate as

423 homozygotes at a permissive temperature of 15°C, while being maternal-effect lethal or sterile  
424 at a restrictive temperature of 25°C. Curiously, four of these temperature sensitive alleles were  
425 the results of stop codons, not missense mutations.

426

427 Seven candidate genes (16 alleles) were hypothesized to be involved in male fertility, based on  
428 the production of unfertilized oocytes by hermaphrodites and/or predominantly male gene  
429 expression patterns. These 16 strains were assayed for their ability to be rescued through mating  
430 with wild-type males. 14 of the strains were rescued by the mating assay, while two strains failed  
431 to rescue (Table 5). Phenotypic rescue through mating was consistent among alleles of the same  
432 gene in five of the seven genes, while two genes had conflicting results among the pair of alleles  
433 in their complementation groups (*F56D5.2* and *nstp-2*).

434

#### 435 **Terminal phenotypes of maternal-effect lethal embryos**

436 Using DIC microscopy, the terminal phenotypes of 28 maternal-effect lethal strains (a subset of  
437 the 40 GOI strains) were observed. Representative images were selected and compiled into a  
438 catalogue of terminal phenotypes (Supplementary Appendix S3). Ten strains showed an osmotic  
439 integrity defective (OID) phenotype (as described in Sönnichsen *et al.* 2005) in nearly all embryos  
440 after incubation in distilled water, while three additional strains had only some embryos that  
441 exhibited this phenotype (Table 3). The OID phenotype was evident in embryos that filled the  
442 eggshell completely (for example, *dgtr-1(t2043)*, Figure 3A) and eggs that burst in their  
443 hypotonic surroundings. Early embryonic arrest was observed in embryos from the two *dlat-1*  
444 mutant strains (*t2035* and *t2056*), which arrested most often with only one to four cells (for

445 example, Figure 3B). Eleven strains had embryos that terminated with approximately 100-200  
446 cells (for example, *ZK688.9(t1433)*, Figure 3C); while four strains developed into two- or three-  
447 fold stage embryos that did not hatch and exhibited clear morphological defects, such as *nstp-*  
448 *2(t1835)* with a lumpy body wall and constricted nose tip (Figure 3D).

449

450

451

452

453 DISCUSSION

454

455

456 **Revisiting legacy mutant collections with whole genome sequencing**

457 In this study, we focused on reexamining legacy collections of *C. elegans* mutants isolated before  
458 the complete genome sequence was published (The *C. elegans* Sequencing Consortium 1998)  
459 and long before massively parallel sequencing was widely available. With major advances in  
460 sequencing technology in the past 30 years (reviewed in Goodwin *et al.* 2016), WGS has become  
461 affordable and accessible, making it possible to revisit past projects with new approaches and  
462 advanced capabilities. We have sequenced paired alleles from 75 complementation groups on  
463 chromosomes III, IV, and V, from which we identified 58 essential genes (Table 2).

464

465 While WGS is a powerful tool, it does not stand alone as a solution to identifying mutant alleles.  
466 This study has shown the power of having multiple alleles in a complementation group when  
467 faced with the abundance of genomic variants found in WGS analysis. Indeed, when we  
468 sequenced four single alleles, which had no complementation pairs, we were unable to  
469 designate a single mutation as the variant responsible for maternal-effect lethality (data not  
470 shown). Our approach to gene identification proved to be effective and was validated by a  
471 combination of different methods. The blind test set of 17 previously sequenced alleles from  
472 which eight of nine genes were readily identified serves as an important validation of our  
473 analysis pipeline and gives confidence in the results we obtained. In addition, the deficiency  
474 mapping data, gene expression patterns from the modENCODE project, GO term analysis, and  
475 phenotypes documented from previous experiments provide evidence to support the gene  
476 identities we assigned in these mutant collections.

477

478 The CRISPR-Cas9 deletion alleles we generated for selected gene candidates provide additional  
479 validation and will be made available to the research community to serve as useful tools for  
480 future studies. While the mutant alleles from the original study have been outcrossed, the  
481 genetic balancer background and additional mutations that persist can complicate phenotypic  
482 analysis. In contrast, these new CRISPR-Cas9 deletion strains were made in a wild-type  
483 background, which makes it much easier to handle them and interpret their mutant phenotypes.  
484 Furthermore, the pharyngeal GFP expression introduced by the gene editing approach acts as a  
485 dominant and straightforward marker for tracking the alleles in a heterozygous population. This  
486 is useful as the homozygous animals do not produce viable progeny.

487

488 The complementation groups that could not be assigned gene identities in our analysis may have  
489 been complicated by variants in noncoding regions, poor sequencing coverage, or inaccurate  
490 complementation pairing, among other possibilities. In future work, tracking down the genes we  
491 were unable to identify will require repeating complementation tests and re-tooling the analysis  
492 approach.

493

#### 494 **Gene ontology analysis reveals common themes and gaps in our knowledge**

495 The underlying biological themes of the 58 essential genes were revealed by examining their GO  
496 terms. The biological processes represented in Figure 2 help to confirm the nature of this set, as  
497 a collection of genes that are required for essential functions such as cell division, metabolism,  
498 and development. Performing GO-term analysis also revealed that a number of the genes in this



499 collection lacked sufficient annotation to be interpreted this way. We found four genes about  
500 which there is little to nothing known (*D2096.12*, *F56D5.2*, *T22B11.1*, and *Y54G2A.73*). For  
501 example, *F56D5.2* is a gene with no associated GO terms, no known protein domains, and no  
502 orthologs in other model organisms. These wholly uncharacterized genes are intriguing  
503 candidates which may help uncover new biological processes and biochemical pathways that are  
504 evidently fundamental to life for this organism.

505

#### 506 **Examining expression patterns leads to discovery of genes involved in male fertility**

507 The life stage-specific expression patterns (Supplementary Appendix S2) provide some insight  
508 into the roles the genes in this collection play in development. 15 of the 19 GOI are highly  
509 expressed in the early embryo and hermaphrodite gonad, which suggests that the gene product  
510 is passed on to the embryo from the parent. Five of these maternal genes also have elevated  
511 expression during late embryonic and larval stages, which suggests they are pleiotropic. The  
512 zygotic functions of these genes must be non-essential or else a zygotic lethal, rather than  
513 maternal-effect lethal, phenotype would be observed.

514

515 We also identified four genes that are most highly expressed in males and L4 hermaphrodites, as  
516 well as three genes that have prominent male expression in addition to characteristic maternal  
517 expression patterns. Mating assays confirmed that these male-expressed genes have an essential  
518 role in male fertility. Studies have shown that genes expressed in sperm are largely insensitive to  
519 RNAi (Fraser *et al.* 2000; Gönczy *et al.* 2000; Reinke *et al.* 2004; del Castillo-Olivares *et al.* 2009;  
520 Zhu *et al.* 2009; Ma *et al.* 2014), making these types of genes particularly difficult to identify in

521 high-throughput RNAi screens. With the availability of RNA-seq data across different life stages  
522 for nearly every gene in the *C. elegans* genome (Hillier *et al.* 2009; Gerstein *et al.* 2010, 2014;  
523 Boeck *et al.* 2016; Tintori *et al.* 2016; Packer *et al.* 2019), screening for characteristic gene  
524 expression patterns may be a useful approach for identifying sterile and maternal-effect lethal  
525 genes that remain to be discovered.

526

527 We propose that the seven male-expressed genes are involved in sperm production and/or  
528 function (see Table 5). These genes are mostly uncharacterized, and this is the first reporting of  
529 their involvement in male fertility. While the mutant hermaphrodites lay unfertilized oocytes (5  
530 genes) or dead eggs (2 genes), this phenotype could be rescued in 14 of the 16 alleles by the  
531 introduction of wild-type sperm through mating. The two alleles that could not be rescued had  
532 allele pairs in the same complementation groups that were rescued in the mating assay. One of  
533 these discrepancies, between *F56D5.2(t1744)* and *F56D5.2(t1791)*, was resolved when we found  
534 a second mutation in a nearby essential gene that was likely responsible for the inability of one  
535 strain to be rescued (data not shown). The presence of additional lethal mutations in the  
536 genome is unsurprising given the nature of chemical mutagenesis, and it reinforces the  
537 advantage of having multiple alleles for a gene when interpreting mutant phenotypes.

538

### 539 **Interpreting terminal phenotypes of maternal-effect lethal mutants**

540 The catalogue of terminal phenotypes (Supplementary Appendix S3) created in this study  
541 provides a window into the roles the maternal-effect genes play in development. Some of these  
542 phenotypes corroborate previously observed phenotypes from RNAi studies. For example, RNAi

543 knockdown experiments have shown that DLAT-1 is an enzyme involved in metabolic processes  
544 required for cell division in one-cell *C. elegans* embryos (Rahman *et al.* 2014). We uncovered two  
545 alleles of *dlat-1* in this study (*t2035* and *t2056*) in which most embryos arrest at the one- to four-  
546 cell stage (Figure 3B). The mutant alleles presented here can confirm previously reported  
547 phenotypes and serve as new genetic tools for continuing the study of essential gene function.

548

549 We also identified alleles for six genes that exhibit an osmotic integrity defective (OID)  
550 phenotype, resulting in embryos that filled the eggshell completely or burst in distilled water.  
551 More than 100 genes have been identified in RNAi screens as important for the osmotic integrity  
552 of developing embryos (reviewed in Stein and Golden 2018). Some of these genes have roles in  
553 lipid metabolism (Rappleye *et al.* 2003; Benenati *et al.* 2009), cellular trafficking (Rappleye *et al.*  
554 1999), and chitin synthesis (Johnston *et al.* 2006). Four of the six genes identified with OID  
555 mutants in this study have been previously implicated in osmotic sensitivity: *dgtr-1* is involved in  
556 lipid biosynthesis (Carvalho *et al.* 2011; Olson *et al.* 2012), *trcs-1* is involved in lipid metabolism  
557 and membrane trafficking (Green *et al.* 2011); *perm-5* is predicted to have lipid binding activity;  
558 and *F21D5.1* is an ortholog of human PGM3, an enzyme involved in the hexosamine pathway  
559 which generates substrates for chitin synthase. We found OID mutants for two additional genes  
560 that were not previously characterized with this phenotype, *bckd-1A* and *D2096.12*. *bckd-1A* is a  
561 component of the branched-chain alpha-keto dehydrogenase complex, which is involved in fatty  
562 acid biosynthesis (Kniazeva *et al.* 2004); this may be indicative of a role in generating or  
563 maintaining the lipid-rich permeability barrier. *D2096.12* is a *Caenorhabditis*-specific gene with  
564 no known protein domains. Elucidating the function of this uncharacterized gene may lead to

565 new insights about the biochemistry of eggshell formation and permeability in *C. elegans*  
566 embryos.  
567  
568 Most of the mutant strains we examined with DIC microscopy arrested around the 100- to 200-  
569 cell stage as a seemingly disorganized group of cells (for example, Figure 3C). Others developed  
570 into two-fold or later stage embryos that moved inside the eggshell but did not hatch (for  
571 example, Figure 3D). The terminal phenotypes documented here reveal how long the embryo  
572 can persist without the maternal contribution of gene products, and the developmental defects  
573 that ensue. Future studies might make use of fluorescent markers and automated cell lineage  
574 tracking (for example, Thomas *et al.* 1996; Schnabel *et al.* 1997; Bao *et al.* 2006; Wang *et al.*  
575 2019) as well as single-cell transcriptome data (Tintori *et al.* 2016; Packer *et al.* 2019) to further  
576 investigate these essential genes.

577

### 578 **Relevance beyond *C. elegans***

579 In this collection of 58 essential genes, there are 47 genes (81%) with human orthologs; a two-  
580 fold enrichment when compared to all *C. elegans* genes, 41% of which have human orthologs  
581 (Kim *et al.* 2018). This is in line with previous findings that essential genes are more often  
582 phylogenetically conserved than non-essential genes (Hughes 2002; Jordan *et al.* 2002; Georgi *et*  
583 *al.* 2013). Essential genes in model organisms are often associated with human diseases (Culetto  
584 and Sattelle 2000; Silverman *et al.* 2009; Dickerson *et al.* 2011; Qin *et al.* 2018), making the  
585 alleles identified in this study potentially relevant to understanding human health. Indeed, there  
586 are OMIM disease phenotypes associated with a number of the human orthologs identified in

587 Table 2. Novel mutant alleles in *C. elegans* may help us better understand genetic disorders by  
588 providing new opportunities to interrogate gene function, explore genetic interactions, and  
589 screen prospective therapeutics.  
590  
591 Nematode-specific genes that are essential are important to nematode biology in general and  
592 are particularly relevant in parasitic nematology. We found three genes in our GOI list (*F56D5.2*,  
593 *perm-5*, and *T22B11.1*) that have orthologs in parasitic nematode species and not in other phyla.  
594 With growing anthelmintic drug resistance around the world (Jabbar *et al.* 2006), novel  
595 management strategies are needed to combat parasitic nematodes, which infect crops,  
596 livestock, and people worldwide (Nicol *et al.* 2011; Wolstenholme *et al.* 2004; Hotez *et al.* 2008).  
597 Essential genes are desirable targets for drug development, yet identifying such genes in  
598 parasites experimentally is difficult (Kumar *et al.* 2007; Doyle *et al.* 2010). Thus, as a free-living  
599 nematode, *C. elegans* is a widely used model for genetically intractable parasitic species (Bürglin  
600 *et al.* 1998; Hashmi *et al.* 2001). Our identification of novel essential genes with orthologs in  
601 parasitic nematodes may provide new opportunities to explore management strategies.  
602  
603 It is our hope that the alleles and phenotypes presented here will serve as a starting point and  
604 guide future research to elucidate the specific roles these genes play in embryogenesis. All of the  
605 alleles presented in this study are available to the research community through the  
606 Caenorhabditis Genetics Center ([cgc.umn.edu](http://cgc.umn.edu)) and we anticipate they will serve as a valuable  
607 resource in the years to come. The wealth of material uncovered in this specific legacy collection  
608 will hopefully inspire similar explorations of other frozen mutant collections.

609 ACKNOWLEDGEMENTS

610

611

612 The authors thank Mark L. Edgley for advice and help with strain maintenance, as well as Negin

613 Khosravi, who replicated some of the nematode assays and conducted PCR assays with

614 *F56D5.2(t1744)* to reveal an additional mutation in a nearby an essential gene. This work was

615 supported by a CIHR Canada Graduate Scholarship-Master's (awarded to EL) and CIHR grant PJT-

616 148549 (awarded to DGM). This work was also supported by a grant from NSERC to DGM and an

617 R24 NIH grant 5R24OD023041 (awarded to Ann Rougvie, Paul Sternberg, Geraldine Seydoux and

618 DGM).

619

TABLES

620

621 **Table 1.** Summary of mutant collections

| Collection | Number of Complementation Groups with $\geq 2$ alleles | Chromosome | Mutant Genotypes                                                                                  |
|------------|--------------------------------------------------------|------------|---------------------------------------------------------------------------------------------------|
| A          | 32                                                     | III        | <i>unc-32(e189) let(t...)/qC1 III; him-3(e1147) IV</i>                                            |
| B          | 25                                                     | IV         | <i>him-9(e1487) II; unc-24(e138) let(t...)/nT1 [let(m435)] IV; dpy-11(e224)/nT1 [let(m435)] V</i> |
|            | 18                                                     | V          | <i>him-9(e1487) II; unc-24(e138)/nT1 [let(m435)] IV; dpy-11(e224) let(t...)/nT1 [let(m435)] V</i> |

622

623

624 Table 2. List of 58 essential genes with associated maternal-effect lethal or sterile alleles

| Group   | Strain | Allele(s) | Gene           | Chr. | Position | Base Change |   | Mutation | Mutation Type | Amino Acid Change <sup>†</sup> | Protein Size (Amino Acids) <sup>†</sup> | Human Ortholog(s)                      | Associated OMIM phenotype(s) <sup>‡</sup>                                                                                                                          |
|---------|--------|-----------|----------------|------|----------|-------------|---|----------|---------------|--------------------------------|-----------------------------------------|----------------------------------------|--------------------------------------------------------------------------------------------------------------------------------------------------------------------|
| Y       | GE2430 | t2135     | <b>air-1</b>   | V    | 8221773  | C           | T | SNV      | missense      | R62C                           | 326                                     | AURKA, AURKB, AURKC, STK36             | Colorectal cancer, susceptibility to [114500]; Spermatogenic failure 5 [243060]                                                                                    |
|         | GE2337 | t2095     | <b>air-1</b>   | V    | 8223169  | CAT         | C | deletion | frameshift    | -                              |                                         |                                        |                                                                                                                                                                    |
| x       | GE2314 | t1724     | <b>aptf-2</b>  | IV   | 13414105 | A           | G | SNV      | missense      | L244P                          | 367                                     | TFAP2A, TFAP2B, TFAP2C, TFAP2D, TFAP2E | Char syndrome [169100]; Patent ductus arteriosus 2 [617035]; Branchiooculofacial syndrome [113620]                                                                 |
|         | GE2289 | t1836     | <b>aptf-2</b>  | IV   | 13414263 | G           | T | SNV      | nonsense      | C191*                          |                                         |                                        |                                                                                                                                                                    |
| H       | GE1958 | t1726     | <b>atg-7</b>   | IV   | 11079764 | G           | A | SNV      | nonsense      | Q367*                          | 647                                     | ATG7                                   | (none)                                                                                                                                                             |
|         | GE1936 | t1738     | <b>atg-7</b>   | IV   | 11079973 | C           | T | SNV      | nonsense      | W311*                          |                                         |                                        |                                                                                                                                                                    |
| T       | GE2449 | t2143     | <b>atl-1</b>   | V    | 9635587  | C           | T | SNV      | nonsense      | W2346*                         | 2531                                    | ATR, PRKDC                             | Cutaneous telangiectasia and cancer syndrome, familial [614564]; Seckel syndrome 1 [210600]; Immunodeficiency 26 with or without neurologic abnormalities [615966] |
|         | GE2467 | t2155     | <b>atl-1</b>   | V    | 9637978  | C           | T | SNV      | missense      | E1710K                         |                                         |                                        |                                                                                                                                                                    |
| gene-28 | GE2200 | t1480     | <b>bckd-1A</b> | III  | 12969933 | G           | A | SNV      | nonsense      | Q174*                          | 432                                     | BCKDHA, TMEM91, AC011462.1             | Maple syrup urine disease [248600]                                                                                                                                 |
|         | GE1742 | t1461     | <b>bckd-1A</b> | III  | 12971429 | G           | A | SNV      | nonsense      | Q109*                          |                                         |                                        |                                                                                                                                                                    |
| gene-17 | GE2206 | t1514     | <b>bckd-1A</b> | III  | 12971273 | G           | A | SNV      | nonsense      | Q161*                          |                                         |                                        |                                                                                                                                                                    |
|         | GE2627 | t1603     | <b>bckd-1A</b> | III  | 12971305 | C           | T | SNV      | nonsense      | W150*                          |                                         |                                        |                                                                                                                                                                    |
| vz      | GE2890 | t1821     | <b>C34D4.4</b> | IV   | 7150054  | G           | A | SNV      | nonsense      | W101*                          | 205                                     | TVP23A, TVP23B, TVP23C, TVP23C-CDRT4   | (none)                                                                                                                                                             |
|         | GE2840 | t1860     | <b>C34D4.4</b> | IV   | 7150143  | G           | A | SNV      | nonsense      | W131*                          |                                         |                                        |                                                                                                                                                                    |
| a       | GE2734 | t2029     | <b>C56A3.8</b> | V    | 13560728 | G           | A | SNV      | missense      | G62E                           | 402                                     | PI4K2A, PI4K2B                         | (none)                                                                                                                                                             |
|         | GE2886 | t2055     | <b>C56A3.8</b> | V    | 13560787 | G           | A | SNV      | missense      | E243K                          |                                         |                                        |                                                                                                                                                                    |
|         | GE2487 | t2149     | <b>C56A3.8</b> | V    | 13561369 | C           | T | SNV      | missense      | P82L                           |                                         |                                        |                                                                                                                                                                    |
| V       | GE2142 | t2074     | <b>ccz-1</b>   | V    | 13679756 | T           | A | SNV      | nonsense      | Y248*                          | 528                                     | CCZ1, CCZ1B                            | (none)                                                                                                                                                             |
|         | GE2304 | t2129     | <b>ccz-1</b>   | V    | 13680792 | C           | T | SNV      | nonsense      | Q361*                          |                                         |                                        |                                                                                                                                                                    |



| Group   | Strain | Allele(s)      | Gene            | Chr. | Position | Base Change |   | Mutation | Mutation Type | Amino Acid Change <sup>†</sup> | Protein Size (Amino Acids) <sup>†</sup> | Human Ortholog(s)                                    | Associated OMIM phenotype(s) <sup>‡</sup>                                                                                                      |
|---------|--------|----------------|-----------------|------|----------|-------------|---|----------|---------------|--------------------------------|-----------------------------------------|------------------------------------------------------|------------------------------------------------------------------------------------------------------------------------------------------------|
|         |        |                |                 |      |          |             |   |          |               |                                |                                         |                                                      |                                                                                                                                                |
| b       | GE2047 | t2021          | <b>cept-2</b>   | V    | 14349388 | G           | A | SNV      | nonsense      | W128*                          | 424                                     | CEPT1, CHPT1, SELENOI                                | Spastic paraplegia 81, autosomal recessive [618768]                                                                                            |
|         | GE2122 | t2007          | <b>cept-2</b>   | V    | 14349747 | G           | A | SNV      | splice site   | -                              |                                         |                                                      |                                                                                                                                                |
| gene-4  | GE2275 | t1517          | <b>cls-2</b>    | III  | 9055405  | G           | A | SNV      | missense      | R102Q                          | 1023                                    | CLASP1, CLASP2                                       | (none)                                                                                                                                         |
|         | GE2357 | t1527          | <b>cls-2</b>    | III  | 9055440  | G           | A | SNV      | missense      | G114R                          |                                         |                                                      |                                                                                                                                                |
| R       | GE2082 | t2053          | <b>cpl-1</b>    | V    | 16593886 | G           | A | SNV      | missense      | S148F                          | 337                                     | CTSF, CTSK, CTSL, CTSS, CTSV                         | Pycnodysostosis [265800]; Ceroid lipofuscinosis, neuronal, 13 [615362]                                                                         |
|         | GE2451 | t2144          | <b>cpl-1</b>    | V    | 16595201 | G           | A | SNV      | nonsense      | Q49*                           |                                         |                                                      |                                                                                                                                                |
| A       | GE2447 | t1879          | <b>cpt-2</b>    | IV   | 11180120 | C           | T | SNV      | nonsense      | Q141*                          | 646                                     | CPT2                                                 | Carnitine palmitoyltransferase II deficiency [600649, 608836, 255110]; Encephalopathy, acute, infection-induced, susceptibility to, 4 [614212] |
|         | GE1938 | t1742          | <b>cpt-2</b>    | IV   | 11180603 | G           | A | SNV      | nonsense      | W194*                          |                                         |                                                      |                                                                                                                                                |
| gene-24 | GE2657 | t1704          | <b>cra-1</b>    | III  | 6867181  | G           | A | SNV      | nonsense      | Q525*                          | 958                                     | NAA25                                                | (none)                                                                                                                                         |
|         | GE2242 | t1618          | <b>cra-1</b>    | III  | 6868737  | C           | T | SNV      | nonsense      | W149*                          |                                         |                                                      |                                                                                                                                                |
| D       | GE1929 | t1729          | <b>csr-1</b>    | IV   | 7960467  | T           | A | SNV      | missense      | N708K                          | 1030                                    | (none)                                               | (none)                                                                                                                                         |
|         | GE1929 | t1729          | <b>csr-1</b>    | IV   | 7961246  | G           | A | SNV      | missense      | G922E                          |                                         |                                                      |                                                                                                                                                |
|         | GE2452 | t1897          | <b>csr-1</b>    | IV   | 7959252  | G           | A | SNV      | splice site   | -                              |                                         |                                                      |                                                                                                                                                |
| gene-25 | GE2595 | t1662<br>t1718 | <b>cup-5</b>    | III  | 7585568  | C           | T | SNV      | nonsense      | R263*                          | 668                                     | MCOLN1, MCOLN2, MCOLN3                               | Mucopolipidosis IV [252650]                                                                                                                    |
|         | GE2355 | t1528          | <b>cup-5</b>    | III  | 7590536  | G           | A | SNV      | splice site   | -                              |                                         |                                                      |                                                                                                                                                |
| gene-30 | GE2345 | t1525          | <b>cyk-3</b>    | III  | 6020590  | C           | T | SNV      | nonsense      | Q98*                           | 1178                                    | USP15, USP32, USP6                                   | (none)                                                                                                                                         |
|         | GE2352 | t1535          | <b>cyk-3</b>    | III  | 6022863  | G           | A | SNV      | nonsense      | W723*                          |                                         |                                                      |                                                                                                                                                |
| J       | GE2499 | t1877          | <b>D2096.12</b> | IV   | 8363937  | C           | T | SNV      | nonsense      | Q126*                          | 763                                     | (none)                                               | (none)                                                                                                                                         |
|         | GE2407 | t1906          | <b>D2096.12</b> | IV   | 8365654  | T           | A | SNV      | nonsense      | L638*                          |                                         |                                                      |                                                                                                                                                |
| O       | GE2135 | t2043          | <b>dgtr-1</b>   | V    | 6497335  | G           | A | SNV      | splice site   | -                              | 359                                     | AWAT1, AWAT2, DGAT2, DGAT2L6, MOGAT1, MOGAT2, MOGAT3 | (none)                                                                                                                                         |
|         | GE2063 | t2042          | <b>dgtr-1</b>   | V    | 6498186  | G           | A | SNV      | missense      | G310R                          |                                         |                                                      |                                                                                                                                                |

| Group   | Strain | Allele(s) | Gene           | Chr. | Position | Base Change |   | Mutation | Mutation Type | Amino Acid Change <sup>†</sup> | Protein Size (Amino Acids) <sup>†</sup> | Human Ortholog(s)           | Associated OMIM phenotype(s) <sup>‡</sup>                                                               |
|---------|--------|-----------|----------------|------|----------|-------------|---|----------|---------------|--------------------------------|-----------------------------------------|-----------------------------|---------------------------------------------------------------------------------------------------------|
|         |        |           |                |      |          |             |   |          |               |                                |                                         |                             |                                                                                                         |
| C       | GE2028 | t1801     | <b>dif-1</b>   | IV   | 7552230  | A           | C | SNV      | nonsense      | Y187*                          | 312                                     | SLC25A20                    | Carnitine-acylcarnitine translocase deficiency [212138]                                                 |
|         | GE1932 | t1732     | <b>dif-1</b>   | IV   | 7552641  | C           | T | SNV      | missense      | G75D                           |                                         |                             |                                                                                                         |
| gene-13 | GE2612 | t1676     | <b>div-1</b>   | III  | 10245480 | G           | A | SNV      | nonsense      | Q489*                          | 581                                     | POLA2                       | (none)                                                                                                  |
|         | GE2577 | t1642     | <b>div-1</b>   | III  | 10248544 | C           | T | SNV      | start ATG     | M1I                            |                                         |                             |                                                                                                         |
| d       | GE2335 | t2056     | <b>dlat-1</b>  | V    | 14445907 | G           | A | SNV      | nonsense      | Q419*                          | 507                                     | DLAT                        | Pyruvate dehydrogenase E2 deficiency [245348]                                                           |
|         | GE2541 | t2035     | <b>dlat-1</b>  | V    | 14446981 | G           | A | SNV      | missense      | P83L                           |                                         |                             |                                                                                                         |
| u       | GE2402 | t1940     | <b>F21D5.1</b> | IV   | 8727315  | C           | T | SNV      | missense      | A436V                          | 550                                     | PGM3                        | Immunodeficiency 23 [615816]                                                                            |
|         | GE2445 | t1935     | <b>F21D5.1</b> | IV   | 8727668  | C           | T | SNV      | missense      | L539F                          |                                         |                             |                                                                                                         |
| t       | GE2837 | t1791     | <b>F56D5.2</b> | IV   | 9397791  | G           | A | SNV      | nonsense      | Q214*                          | 385                                     | (none)                      | (none)                                                                                                  |
|         | GE2881 | t1744     | <b>F56D5.2</b> | IV   | 9398158  | G           | A | SNV      | missense      | S107F                          |                                         |                             |                                                                                                         |
| gene-26 | GE1715 | t1436     | <b>gsp-2</b>   | III  | 7337087  | C           | T | SNV      | nonsense      | R95*                           | 333                                     | PPP1CA, PPP1CB, PPP1CC      | Noonan syndrome-like disorder with loose anagen hair 2 [617506]                                         |
|         | GE2360 | t1481     | <b>gsp-2</b>   | III  | 7337383  | G           | A | SNV      | missense      | G174E                          |                                         |                             |                                                                                                         |
| gene-32 | GE2545 | t1577     | <b>gsr-1</b>   | III  | 3652401  | G           | A | SNV      | missense      | G335R                          | 473                                     | GSR, TXNRD1, TXNRD2, TXNRD3 | Hemolytic anemia due to glutathione reductase deficiency [618660]; Glucocorticoid deficiency 5 [617825] |
|         | GE2644 | t1594     | <b>gsr-1</b>   | III  | 3652407  | C           | T | SNV      | nonsense      | R337*                          |                                         |                             |                                                                                                         |
| gene-31 | GE2583 | t1654     | <b>hcp-3</b>   | III  | 9615498  | G           | A | SNV      | missense      | R269C                          | 288                                     | CENPA                       | (none)                                                                                                  |
|         | GE2692 | t1717     | <b>hcp-3</b>   | III  | 9615555  | C           | T | SNV      | missense      | E250K                          |                                         |                             |                                                                                                         |
| G       | GE2455 | t1914     | <b>klp-18</b>  | IV   | 7040335  | T           | C | SNV      | missense      | Y42H                           | 932                                     | KIF15                       | (none)                                                                                                  |
|         | GE2000 | t1795     | <b>klp-18</b>  | IV   | 7041203  | G           | A | SNV      | missense      | E316K                          |                                         |                             |                                                                                                         |
| gene-6  | GE2367 | t1563     | <b>klp-19</b>  | III  | 13306451 | A           | T | SNV      | missense      | L230H                          | 1083                                    | KIF4A, KIF4B                | Mental retardation, X-linked 100 [300923]                                                               |
|         | GE2367 | t1563     | <b>klp-19</b>  | III  | 13306457 | G           | A | SNV      | missense      | A228V                          |                                         |                             |                                                                                                         |
|         | GE2264 | t1628     | <b>klp-19</b>  | III  | 13306872 | C           | T | SNV      | missense      | G90R                           |                                         |                             |                                                                                                         |
| I       | GE2003 | t1817     | <b>let-99</b>  | IV   | 12569291 | C           | T | SNV      | nonsense      | Q447*                          | 698                                     | (none)                      | (none)                                                                                                  |
|         | GE2514 | t1912     | <b>let-99</b>  | IV   | 12570199 | C           | T | SNV      | missense      | L617F                          |                                         |                             |                                                                                                         |

| Group   | Strain | Allele(s) | Gene          | Chr. | Position | Base Change |   | Mutation | Mutation Type | Amino Acid Change <sup>†</sup> | Protein Size (Amino Acids) <sup>†</sup> | Human Ortholog(s)   | Associated OMIM phenotype(s) <sup>‡</sup>                 |
|---------|--------|-----------|---------------|------|----------|-------------|---|----------|---------------|--------------------------------|-----------------------------------------|---------------------|-----------------------------------------------------------|
|         |        |           |               |      |          |             |   |          |               |                                |                                         |                     |                                                           |
| gene-22 | GE2730 | t1550     | <b>lis-1</b>  | III  | 13375376 | C           | T | SNV      | nonsense      | W92*                           | 404                                     | PAFAH1B1            | Lissencephaly 1; Subcortical laminar heterotopia [607432] |
|         | GE2653 | t1698     | <b>lis-1</b>  | III  | 13375401 | C           | T | SNV      | splice site   | -                              |                                         |                     |                                                           |
| z       | GE2130 | t1765     | <b>mbk-2</b>  | IV   | 13033086 | C           | T | SNV      | missense      | R533C                          | 817                                     | DYRK2, DYRK3, DYRK4 | (none)                                                    |
|         | GE2503 | t1888     | <b>mbk-2</b>  | IV   | 13033644 | C           | T | SNV      | missense      | P701L                          |                                         |                     |                                                           |
| gene-10 | GE2740 | t1576     | <b>mel-32</b> | III  | 6440655  | C           | T | SNV      | missense      | G395R                          | 507                                     | SHMT1, SHMT2        | (none)                                                    |
|         | GE1731 | t1456     | <b>mel-32</b> | III  | 6440831  | C           | T | SNV      | missense      | G336E                          |                                         |                     |                                                           |
| M       | GE1999 | t1793     | <b>mex-5</b>  | IV   | 13354014 | T           | G | SNV      | nonsense      | Y79*                           | 468                                     | (none)              | (none)                                                    |
|         | GE2093 | t1800     | <b>mex-5</b>  | IV   | 13354478 | T           | A | SNV      | nonsense      | L219*                          |                                         |                     |                                                           |
| S       | GE2511 | t2162     | <b>mom-2</b>  | V    | 8356808  | T           | G | SNV      | missense      | C80G                           | 362                                     | WNT11, WNT9A, WNT9B | (none)                                                    |
|         | GE2523 | t2180     | <b>mom-2</b>  | V    | 8357121  | T           | C | SNV      | missense      | C139R                          |                                         |                     |                                                           |
| W       | GE2497 | t2137     | <b>mre-11</b> | V    | 10735712 | G           | A | SNV      | missense      | H269Y                          | 728                                     | MRE11               | Ataxia-telangiectasia-like disorder 1 [604391]            |
|         | GE2103 | t2092     | <b>mre-11</b> | V    | 10736080 | A           | G | SNV      | missense      | F146S                          |                                         |                     |                                                           |
| v       | GE2091 | t1772     | <b>nstp-2</b> | IV   | 6604731  | A           | T | SNV      | missense      | L277H                          | 324                                     | SLC35B4             | (none)                                                    |
|         | GE2288 | t1835     | <b>nstp-2</b> | IV   | 6605266  | C           | T | SNV      | missense      | G131R                          |                                         |                     |                                                           |
| F       | GE2391 | t1932     | <b>perm-5</b> | IV   | 5696931  | A           | T | SNV      | missense      | C454S                          | 518                                     | (none)              | (none)                                                    |
|         | GE2453 | t1900     | <b>perm-5</b> | IV   | 5698096  | A           | G | SNV      | missense      | S323P                          |                                         |                     |                                                           |
| gene-21 | GE2237 | t1614     | <b>pod-1</b>  | III  | 13518266 | G           | A | SNV      | missense      | A912V                          | 1136                                    | CORO7, CORO7-PAM16  | (none)                                                    |
|         | GE2605 | t1674     | <b>pod-1</b>  | III  | 13518357 | G           | A | SNV      | nonsense      | R882*                          |                                         |                     |                                                           |
| U       | GE3128 | t2177     | <b>pos-1</b>  | V    | 8414544  | G           | A | SNV      | splice site   | -                              | 264                                     | (none)              | (none)                                                    |
|         | GE2101 | t2080     | <b>pos-1</b>  | V    | 8414579  | T           | A | SNV      | missense      | V145D                          |                                         |                     |                                                           |
| Z       | GE2517 | t2175     | <b>rad-50</b> | V    | 12247914 | T           | A | SNV      | nonsense      | L350*                          | 1312                                    | RAD5, AC116366.3    | Nijmegen breakage syndrome-like disorder [613078]         |
|         | GE2476 | t2147     | <b>rad-50</b> | V    | 12250324 | T           | A | SNV      | missense      | I1101N                         |                                         |                     |                                                           |

| Group   | Strain | Allele(s)      | Gene            | Chr. | Position | Base Change |   | Mutation | Mutation Type | Amino Acid Change <sup>†</sup> | Protein Size (Amino Acids) <sup>†</sup> | Human Ortholog(s)                   | Associated OMIM phenotype(s) <sup>‡</sup>                                                                                                                      |
|---------|--------|----------------|-----------------|------|----------|-------------|---|----------|---------------|--------------------------------|-----------------------------------------|-------------------------------------|----------------------------------------------------------------------------------------------------------------------------------------------------------------|
|         |        |                |                 |      |          |             |   |          |               |                                |                                         |                                     |                                                                                                                                                                |
| E       | GE2189 | t1750          | <b>rad-51</b>   | IV   | 10282013 | A           | T | SNV      | missense      | I384N                          | 395                                     | DMC1, RAD51, RAD51B, RAD51C, RAD51D | Fanconi anemia, complementation group R, group O [617244, 613390]; Mirror movements 2 [614508]; Breast-ovarian cancer, familial, susceptibility to, 3 [613399] |
|         | GE2433 | t1885          | <b>rad-51</b>   | IV   | 10282328 | C           | T | SNV      | missense      | V323I                          |                                         |                                     |                                                                                                                                                                |
| gene-11 | GE2347 | t1519          | <b>rmd-1</b>    | III  | 9759805  | G           | A | SNV      | missense      | G89R                           | 226                                     | RMDN2, RMDN3                        | (none)                                                                                                                                                         |
|         | GE2219 | t1501          | <b>rmd-1</b>    | III  | 9759929  | G           | A | SNV      | missense      | R130H                          |                                         |                                     |                                                                                                                                                                |
| gene-18 | GE2211 | t1476          | <b>sas-1</b>    | III  | 12710102 | C           | T | SNV      | missense      | P419S                          | 570                                     | (none)                              | (none)                                                                                                                                                         |
|         | GE2343 | t1521          | <b>sas-1</b>    | III  | 12710202 | G           | A | SNV      | missense      | G452E                          |                                         |                                     |                                                                                                                                                                |
| f       | GE2078 | t2033          | <b>sas-5</b>    | V    | 11612449 | C           | T | SNV      | missense      | R397C                          | 404                                     | (none)                              | (none)                                                                                                                                                         |
|         | GE2134 | t2079          | <b>sas-5</b>    | V    | 11612449 | C           | T | SNV      | missense      | R397C                          |                                         |                                     |                                                                                                                                                                |
| p       | GE2469 | t2173          | <b>spn-4</b>    | V    | 6783986  | A           | T | SNV      | nonsense      | L259*                          | 351                                     | RBFOX1, RBFOX2, RBFOX3              | (none)                                                                                                                                                         |
|         | GE2317 | t2098          | <b>spn-4</b>    | V    | 6784646  | A           | T | SNV      | missense      | V55D                           |                                         |                                     |                                                                                                                                                                |
| g       | GE2386 | t2165          | <b>sqv-4</b>    | V    | 10660827 | G           | A | SNV      | missense      | P182L                          | 481                                     | UGDH                                | Epileptic encephalopathy, early infantile, 84 [618792]                                                                                                         |
|         | GE2059 | t2025          | <b>sqv-4</b>    | V    | 10661143 | G           | A | SNV      | missense      | S93L                           |                                         |                                     |                                                                                                                                                                |
| gene-5  | GE2277 | t1496          | <b>such-1</b>   | III  | 11515520 | G           | A | SNV      | missense      | L686F                          | 798                                     | ANAPC5                              | (none)                                                                                                                                                         |
|         | GE2277 | t1496          | <b>such-1</b>   | III  | 11515883 | G           | A | SNV      | missense      | H565Y                          |                                         |                                     |                                                                                                                                                                |
|         | GE2666 | t1693          | <b>such-1</b>   | III  | 11515540 | C           | T | SNV      | missense      | R679K                          |                                         |                                     |                                                                                                                                                                |
| q       | GE2827 | t1786          | <b>T22B11.1</b> | IV   | 4692945  | G           | A | SNV      | nonsense      | W35*                           | 468                                     | (none)                              | (none)                                                                                                                                                         |
|         | GE2895 | t1866          | <b>T22B11.1</b> | IV   | 4696017  | G           | A | SNV      | nonsense      | W356*                          |                                         |                                     |                                                                                                                                                                |
| gene-12 | GE1734 | t1438<br>t1477 | <b>tlk-1</b>    | III  | 9707175  | C           | T | SNV      | nonsense      | Q412*                          | 965                                     | TLK1, TLK2, TLK2PS1                 | Mental retardation, autosomal dominant 57 [618050]                                                                                                             |
|         | GE2613 | t1677          | <b>tlk-1</b>    | III  | 9708080  | G           | A | SNV      | missense      | A694T                          |                                         |                                     |                                                                                                                                                                |

| Group   | Strain | Allele(s)      | Gene             | Chr. | Position        | Base Change |   | Mutation        | Mutation Type | Amino Acid Change <sup>†</sup> | Protein Size (Amino Acids) <sup>†</sup> | Human Ortholog(s)                       | Associated OMIM phenotype(s) <sup>‡</sup>                                                                                                                                                   |
|---------|--------|----------------|------------------|------|-----------------|-------------|---|-----------------|---------------|--------------------------------|-----------------------------------------|-----------------------------------------|---------------------------------------------------------------------------------------------------------------------------------------------------------------------------------------------|
|         |        |                |                  |      |                 |             |   |                 |               |                                |                                         |                                         |                                                                                                                                                                                             |
| gene-15 | GE2399 | t1559          | <b>top-3</b>     | III  | 11951381        | G           | A | SNV             | nonsense      | Q602*                          | 759                                     | TOP3A                                   | Progressive external ophthalmoplegia with mitochondrial DNA deletions, autosomal recessive 5 [618098]; Microcephaly, growth restriction, and increased sister chromatid exchange 2 [618097] |
|         | GE2220 | t1516          | <b>top-3</b>     | III  | 11958680        | C           | T | SNV             | missense      | G59R                           |                                         |                                         |                                                                                                                                                                                             |
| gene-35 | GE1735 | t1470          | <b>top-3</b>     | III  | 11957525        | C           | T | SNV             | nonsense      | W114*                          |                                         |                                         |                                                                                                                                                                                             |
|         | GE2958 | t1464<br>t1484 | <b>top-3</b>     | III  | 11951669        | C           | T | SNV             | missense      | G506R                          |                                         |                                         |                                                                                                                                                                                             |
| L       | GE2512 | t1909          | <b>trcs-1</b>    | IV   | 9587541         | C           | T | SNV             | missense      | E373K                          | 428                                     | AADAC, AADACL2, AADACL3, AADACL4, NCEH1 | (none)                                                                                                                                                                                      |
|         | GE1939 | t1745          | <b>trcs-1</b>    | IV   | 9587985         | G           | A | SNV             | nonsense      | Q242*                          |                                         |                                         |                                                                                                                                                                                             |
| c       | GE2112 | t2037          | <b>unc-112</b>   | V    | 14692219        | C           | T | SNV             | missense      | R669Q                          | 720                                     | FERMT1, FERMT2, FERMT3                  | Kindler syndrome [173650]; Leukocyte adhesion deficiency, type III [612840]                                                                                                                 |
|         | GE2326 | t2106          | <b>unc-112</b>   | V    | 14696546        | C           | T | SNV             | splice site   | -                              |                                         |                                         |                                                                                                                                                                                             |
| gene-27 | GE1722 | t1435          | <b>vps-33.1</b>  | III  | 8701605         | C           | T | SNV             | nonsense      | R159*                          | 603                                     | VPS33A, VPS33B, AC048338.1              | Mucopolysaccharidosis-plus syndrome [617303]; Arthrogryposis, renal dysfunction [208085]                                                                                                    |
|         | GE2366 | t1561          | <b>vps-33.1</b>  | III  | 8702923         | G           | A | SNV             | nonsense      | W536*                          |                                         |                                         |                                                                                                                                                                                             |
| Q       | GE2292 | t2114          | <b>vps-39</b>    | V    | 14035713        | G           | A | SNV             | nonsense      | Q754*                          | 926                                     | VPS39                                   | (none)                                                                                                                                                                                      |
|         | GE1937 | t2189          | <b>vps-39</b>    | V    | 14036143        | C           | T | SNV             | nonsense      | W626*                          |                                         |                                         |                                                                                                                                                                                             |
|         | GE2056 | t2016          | <b>vps-39</b>    | V    | 14037839        | G           | C | SNV             | nonsense      | Y122*                          |                                         |                                         |                                                                                                                                                                                             |
| N       | GE2153 | t1773          | <b>wapl-1</b>    | IV   | 4444464         | C           | T | SNV             | nonsense      | W348*                          | 748                                     | WAPL                                    | (none)                                                                                                                                                                                      |
|         | GE2305 | t1867          | <b>wapl-1</b>    | IV   | 4442749-4442872 | -           | - | 122-bp deletion | deletion      | -                              |                                         |                                         |                                                                                                                                                                                             |
| p       | GE2738 | t1833          | <b>Y54G2A.73</b> | IV   | 3000662         | A           | T | SNV             | nonsense      | L341*                          | 380                                     | (none)                                  | (none)                                                                                                                                                                                      |
|         | GE2387 | t1913          | <b>Y54G2A.73</b> | IV   | 3001767         | G           | A | SNV             | nonsense      | R252*                          |                                         |                                         |                                                                                                                                                                                             |
|         | GE2884 | t1755          | <b>Y54G2A.73</b> | IV   | 3008481         | C           | T | SNV             | splice site   | -                              |                                         |                                         |                                                                                                                                                                                             |
| gene-23 | GE1713 | t1433          | <b>ZK688.9</b>   | III  | 7882477         | C           | T | SNV             | nonsense      | W135*                          | 281                                     | TIPRL                                   | (none)                                                                                                                                                                                      |
|         | GE2621 | t1587          | <b>ZK688.9</b>   | III  | 7882717         | C           | T | SNV             | splice site   | -                              |                                         |                                         |                                                                                                                                                                                             |
| gene-14 | GE2348 | t1518          | <b>zyg-8</b>     | III  | 12063671        | C           | T | SNV             | nonsense      | R312*                          | 802                                     | DCLK1, DCLK2, DCLK3, DCX                | Lissencephaly, X-linked, 1; Subcortical laminar heterotopia, X-linked [300067]                                                                                                              |
|         | GE2362 | t1547          | <b>zyg-8</b>     | III  | 12063832        | G           | A | SNV             | splice site   | -                              |                                         |                                         |                                                                                                                                                                                             |

625

<sup>†</sup> Amino acid position and size derived from the longest transcript ([wormbase.org](http://wormbase.org), version WS275)

626

<sup>‡</sup> Phenotypes retrieved from [omim.org](http://omim.org)

Table 3. Genes of interest and associated phenotypes

| Strain | Allele | Gene Name      | Protein Function <sup>†</sup>                                                                                   | Amino Acid Change <sup>†</sup> | RNAi Phenotype <sup>‡</sup>                                                                                                                                                                                                                                                                                                                                                                                                                                                             | Mutant Phenotype                 | Embryonic Osmotic Integrity Defect |
|--------|--------|----------------|-----------------------------------------------------------------------------------------------------------------|--------------------------------|-----------------------------------------------------------------------------------------------------------------------------------------------------------------------------------------------------------------------------------------------------------------------------------------------------------------------------------------------------------------------------------------------------------------------------------------------------------------------------------------|----------------------------------|------------------------------------|
| GE1936 | t1738  | <b>atg-7</b>   | E1 ubiquitin-activating-like enzyme orthologous to the autophagic budding yeast protein Apg7p                   | W311*                          | growth variant; dauer body morphology variant; pathogen induced death increased; P granule localization defective; dauer development variant; protein aggregation variant; shortened life span; transgene subcellular localization variant; transgene expression variant; necrotic cell death variant; autophagy variant; antibody staining reduced                                                                                                                                     | dead embryos                     | no                                 |
| GE1958 | t1726  |                |                                                                                                                 | Q367*                          |                                                                                                                                                                                                                                                                                                                                                                                                                                                                                         | dead embryos                     | no                                 |
| GE2627 | t1603  | <b>bckd-1A</b> | Predicted mitochondrial protein with alpha-ketoacid dehydrogenase activity                                      | W150*                          | shortened life span; small                                                                                                                                                                                                                                                                                                                                                                                                                                                              | dead embryos                     | yes                                |
| GE2206 | t1514  |                |                                                                                                                 | Q161*                          |                                                                                                                                                                                                                                                                                                                                                                                                                                                                                         | dead embryos                     | yes                                |
| GE2840 | t1860  | <b>C34D4.4</b> | Predicted to have the following domain: Golgi apparatus membrane protein TVP23-like                             | W131*                          | --                                                                                                                                                                                                                                                                                                                                                                                                                                                                                      | unfertilized oocytes             | N/A                                |
| GE2890 | t1821  |                |                                                                                                                 | W101*                          |                                                                                                                                                                                                                                                                                                                                                                                                                                                                                         | unfertilized oocytes             | N/A                                |
| GE2734 | t2029  | <b>C56A3.8</b> | Predicted to have 1-phosphatidylinositol 4-kinase activity                                                      | G62E                           | larval lethal; accumulated germline cell corpses; germ cell compartment morphology variant; germline nuclear positioning variant; larval arrest; cell membrane organization biogenesis variant; embryonic lethal; rachis narrow; apoptosis variant; maternal sterile; reduced brood size                                                                                                                                                                                                | unfertilized oocytes             | N/A                                |
| GE2487 | t2149  |                |                                                                                                                 | P82L                           |                                                                                                                                                                                                                                                                                                                                                                                                                                                                                         | unfertilized oocytes             | N/A                                |
| GE2886 | t2055  |                |                                                                                                                 | E243K                          |                                                                                                                                                                                                                                                                                                                                                                                                                                                                                         | unfertilized oocytes             | N/A                                |
| GE2122 | t2007  | <b>cept-2</b>  | Predicted to have diacylglycerol cholinephosphotransferase activity and ethanolaminophosphotransferase activity | splice site                    | fat content reduced; embryonic lethal; long                                                                                                                                                                                                                                                                                                                                                                                                                                             | dead embryos                     | no                                 |
| GE2047 | t2021  |                |                                                                                                                 | W128*                          |                                                                                                                                                                                                                                                                                                                                                                                                                                                                                         | no eggs laid (dead embryos) [ts] | some                               |
| GE2275 | t1517  | <b>cls-2</b>   | Member of the CLASP family of microtubule-binding proteins                                                      | R102Q                          | locomotion variant; mitosis variant; univalent meiotic chromosomes; no polar body formation; chromosome segregation variant karyomeres early emb; mitotic chromosome segregation variant; mitotic spindle defective early emb; chromosome segregation variant; embryonic lethal; meiotic spindle defective; meiotic progression during oogenesis variant; exploded through vulva; reduced brood size; antibody subcellular localization variant; meiotic chromosome segregation variant | dead embryos                     | N/T                                |
| GE2357 | t1527  |                |                                                                                                                 | G114R                          |                                                                                                                                                                                                                                                                                                                                                                                                                                                                                         | dead embryos                     | no                                 |
| GE1938 | t1742  | <b>cpt-2</b>   | Carnitine palmitoyl transferase                                                                                 | W194*                          | embryonic lethal                                                                                                                                                                                                                                                                                                                                                                                                                                                                        | dead embryos                     | no                                 |
| GE2447 | t1879  |                |                                                                                                                 | Q141*                          |                                                                                                                                                                                                                                                                                                                                                                                                                                                                                         | dead embryos                     | no                                 |

| Strain | Allele | Gene Name       | Protein Function <sup>†</sup>                                                               | Amino Acid Change <sup>†</sup> | RNAi Phenotype <sup>‡</sup>                                                                                                                                                                                                                                                                                                                                                                          | Mutant Phenotype          | Embryonic Osmotic Integrity Defect |
|--------|--------|-----------------|---------------------------------------------------------------------------------------------|--------------------------------|------------------------------------------------------------------------------------------------------------------------------------------------------------------------------------------------------------------------------------------------------------------------------------------------------------------------------------------------------------------------------------------------------|---------------------------|------------------------------------|
| GE2407 | t1906  | <b>D2096.12</b> | --                                                                                          | L638*                          | locomotion variant                                                                                                                                                                                                                                                                                                                                                                                   | dead embryos              | some                               |
| GE2499 | t1877  |                 |                                                                                             | Q126*                          |                                                                                                                                                                                                                                                                                                                                                                                                      | dead embryos              | yes                                |
| GE2063 | t2042  | <b>dgtr-1</b>   | Acyl chain transfer enzyme                                                                  | G310R                          | sterile; sick; oocyte number decreased; germline nuclear positioning variant; oocyte septum formation variant; embryonic lethal; embryo osmotic integrity defective early emb; oocyte morphology variant; pachytene region organization variant; reduced brood size; germ cell compartment expansion variant; oogenesis variant                                                                      | dead embryos              | some                               |
| GE2135 | t2043  |                 |                                                                                             | splice site                    |                                                                                                                                                                                                                                                                                                                                                                                                      | dead embryos              | yes                                |
| GE2541 | t2035  | <b>dlat-1</b>   | Predicted to have dihydrolipoyllysine-residue acetyltransferase activity                    | P83L                           | embryonic lethal; slow growth; receptor mediated endocytosis defective; pattern of transgene expression variant; sterile progeny; transgene expression increased; general pace of development defective early emb                                                                                                                                                                                    | dead embryos              | no                                 |
| GE2335 | t2056  |                 |                                                                                             | Q419*                          |                                                                                                                                                                                                                                                                                                                                                                                                      | dead embryos              | no                                 |
| GE2402 | t1940  | <b>F21D5.1</b>  | Predicted to have phosphoacetyl-glucosamine mutase activity                                 | A436V                          | sterile; germ cell compartment size variant; rachis wide; rachis morphology variant; accumulated germline cell corpses; germ cell compartment morphology variant; germline nuclear positioning variant; embryonic lethal; embryo osmotic integrity defective early emb; apoptosis variant; reduced brood size; oogenesis variant                                                                     | dead embryos              | yes                                |
| GE2445 | t1935  |                 |                                                                                             | L539F                          |                                                                                                                                                                                                                                                                                                                                                                                                      | dead embryos              | yes                                |
| GE2881 | t1744  | <b>F56D5.2</b>  | --                                                                                          | S107F                          | --                                                                                                                                                                                                                                                                                                                                                                                                   | unfertilized oocytes      | N/A                                |
| GE2837 | t1791  |                 |                                                                                             | Q214*                          |                                                                                                                                                                                                                                                                                                                                                                                                      | unfertilized oocytes      | N/A                                |
| GE2091 | t1772  | <b>nstp-2</b>   | Predicted to have UDP-N-acetylglucosamine and UDP-xylose transmembrane transporter activity | L277H                          | lysosome-related organelle morphology variant; transgene subcellular localization variant; RAB-11 recycling endosome localization variant; RAB-11 recycling endosome morphology variant                                                                                                                                                                                                              | dead embryos              | no                                 |
| GE2288 | t1835  |                 |                                                                                             | G131R                          |                                                                                                                                                                                                                                                                                                                                                                                                      | dead embryos              | no                                 |
| GE2391 | t1932  | <b>perm-5</b>   | Predicted to have lipid binding activity                                                    | C454S                          | sterile; apoptosis reduced; oocytes lack nucleus; oocyte number decreased; germ cell compartment morphology variant; germline nuclear positioning variant; germ cell compartment anucleate; oocyte septum formation variant; cell membrane organization biogenesis variant; embryonic lethal; embryo osmotic integrity defective early emb; oogenesis variant; diplotene region organization variant | dead embryos              | yes                                |
| GE2453 | t1900  |                 |                                                                                             | S323P                          |                                                                                                                                                                                                                                                                                                                                                                                                      | dead embryos              | yes                                |
| GE2827 | t1786  | <b>T22B11.1</b> | --                                                                                          | W35*                           | --                                                                                                                                                                                                                                                                                                                                                                                                   | unfertilized oocytes [ts] | N/A                                |
| GE2895 | t1866  |                 |                                                                                             | W356*                          |                                                                                                                                                                                                                                                                                                                                                                                                      | unfertilized oocytes [ts] | N/A                                |



| Strain | Allele | Gene Name        | Protein Function <sup>†</sup>                                                                | Amino Acid Change <sup>†</sup> | RNAi Phenotype <sup>‡</sup>                                                                                                                                                                                                                                                                                                                                                                                                                                                                                  | Mutant Phenotype                 | Embryonic Osmotic Integrity Defect |
|--------|--------|------------------|----------------------------------------------------------------------------------------------|--------------------------------|--------------------------------------------------------------------------------------------------------------------------------------------------------------------------------------------------------------------------------------------------------------------------------------------------------------------------------------------------------------------------------------------------------------------------------------------------------------------------------------------------------------|----------------------------------|------------------------------------|
| GE2399 | t1559  | <b>top-3</b>     | Exhibits DNA topoisomerase type I (single strand cut, ATP-independent) activity              | G59R                           | chromosome morphology variant; hermaphrodite germline proliferation variant; antibody staining increased; somatic gonad development variant; gonad degenerate; chromosome instability; germ cell mitosis variant; gonad arm morphology variant; meiosis variant; oocyte morphology variant; nuclear appearance variant; fewer germ cells; oogenesis variant                                                                                                                                                  | dead embryos                     | no                                 |
| GE2220 | t1516  |                  |                                                                                              | Q602*                          |                                                                                                                                                                                                                                                                                                                                                                                                                                                                                                              | dead embryos                     | no                                 |
| GE2512 | t1909  | <b>trcs-1</b>    | Putative arylacetamide deacetylase and microsomal lipase                                     | E373K                          | apoptosis reduced; diplotene absent during oogenesis; oocyte number decreased; embryo osmotic integrity defective early emb; rachis narrow; chromosome condensation variant; pachytene region organization variant; membrane trafficking variant; pachytene progression during oogenesis variant; apoptosis fails to occur; egg laying variant; germ cell compartment expansion absent; embryonic lethal; cell membrane organization biogenesis variant; no oocytes; germ cell compartment expansion variant | dead embryos [leaky ts]          | yes                                |
| GE1939 | t1745  |                  |                                                                                              | Q242*                          |                                                                                                                                                                                                                                                                                                                                                                                                                                                                                                              | no eggs laid (dead embryos) [ts] | yes                                |
| GE2884 | t1755  | <b>Y54G2A.73</b> | --                                                                                           | splice site                    | --                                                                                                                                                                                                                                                                                                                                                                                                                                                                                                           | unfertilized oocytes             | N/A                                |
| GE2387 | t1913  |                  |                                                                                              | R252*                          |                                                                                                                                                                                                                                                                                                                                                                                                                                                                                                              | unfertilized oocytes             | N/A                                |
| GE2738 | t1833  |                  |                                                                                              | L341*                          |                                                                                                                                                                                                                                                                                                                                                                                                                                                                                                              | unfertilized oocytes             | N/A                                |
| GE1713 | t1433  | <b>ZK688.9</b>   | Predicted to have the following domain: TIP41-like protein (TOR signaling pathway regulator) | W135*                          | egg laying variant; locomotion variant                                                                                                                                                                                                                                                                                                                                                                                                                                                                       | dead embryos                     | no                                 |
| GE2621 | t1587  |                  |                                                                                              | splice site                    |                                                                                                                                                                                                                                                                                                                                                                                                                                                                                                              | dead embryos                     | no                                 |

[ts] = temperature sensitive

N/A = not applicable

N/T = not tested

-- = no information available

<sup>†</sup> From WormBase (WS275; [wormbase.org](http://wormbase.org)); amino acid position derived from the longest transcript

<sup>‡</sup> Phenotypes retrieved from GExplore ([genome.sfu.ca/gexplore](http://genome.sfu.ca/gexplore))

628

629  
630  
631

**Table 4.** Complementation tests for conflicting groups

| Original Complementation Group | Strain | Allele | Preliminary Gene Candidate | Mapped Under                | Complement Test Results                                    | Final Gene Assignment                      |
|--------------------------------|--------|--------|----------------------------|-----------------------------|------------------------------------------------------------|--------------------------------------------|
| gene-28                        | GE1742 | t1461  | <i>bckd-1A</i>             | None of tested deficiencies | Fails to complement: GE2206, GE2627                        | <i>bckd-1A</i>                             |
| gene-17                        | GE2627 | t1603  | <i>bckd-1A</i>             | <i>tDf5</i>                 | Fails to complement: GE2206, GE1742                        | <i>bckd-1A</i>                             |
|                                | GE2206 | t1514  |                            | <i>tDf5</i>                 | Fails to complement: GE2627, GE1742                        |                                            |
| gene-15                        | GE2220 | t1516  | <i>top-3</i>               | <i>tDf5</i>                 | Fails to complement: GE2399, GE1735<br>Complements: GE2278 | <i>top-3</i>                               |
|                                | GE2399 | t1559  |                            | <i>tDf5</i>                 | Fails to complement: GE2220                                |                                            |
| gene-34                        | GE2278 | t1502  | <i>top-3</i>               | None of tested deficiencies | Fails to complement: GE1735<br>Complements: GE2220         | unknown gene                               |
| gene-35                        | GE1735 | t1470  | <i>top-3</i>               | None of tested deficiencies | Fails to complement: GE2278, GE2220                        | double mutant: <i>top-3</i> + unknown gene |

632 N/T = not tested

633 **Table 5.** Putative male fertility genes

| Strain | Allele | Gene             | Observed Mutant Phenotype | Successful WT Male Rescue |
|--------|--------|------------------|---------------------------|---------------------------|
| GE2627 | t1603  | <b>bckd-1A</b>   | dead embryos              | yes                       |
| GE2206 | t1514  |                  | dead embryos              | yes                       |
| GE2840 | t1860  | <b>C34D4.4</b>   | unfertilized oocytes      | yes                       |
| GE2890 | t1821  |                  | unfertilized oocytes      | yes                       |
| GE2734 | t2029  | <b>C56A3.8</b>   | unfertilized oocytes      | yes                       |
| GE2487 | t2149  |                  | unfertilized oocytes      | yes                       |
| GE2886 | t2055  |                  | unfertilized oocytes      | yes                       |
| GE2881 | t1744  | <b>F56D5.2</b>   | unfertilized oocytes      | no                        |
| GE2837 | t1791  |                  | unfertilized oocytes      | yes                       |
| GE2091 | t1772  | <b>nstp-2</b>    | dead embryos              | no                        |
| GE2288 | t1835  |                  | dead embryos              | yes                       |
| GE2827 | t1786  | <b>T22B11.1</b>  | unfertilized oocytes [ts] | yes                       |
| GE2895 | t1866  |                  | unfertilized oocytes [ts] | yes                       |
| GE2884 | t1755  | <b>Y54G2A.73</b> | unfertilized oocytes      | yes                       |
| GE2387 | t1913  |                  | unfertilized oocytes      | yes                       |
| GE2738 | t1833  |                  | unfertilized oocytes      | yes                       |

634 [ts] = temperature sensitive

635 FIGURE LEGENDS

636

637 **Figure 1** Schematic of gene assignments and deficiency mapping. Genes and deficiencies are  
638 shown with their relative positions on chromosomes III, IV, and V. Approximate boundaries of  
639 each deficiency were determined by the coordinates of the closest gene known to lie outside of  
640 the deletion, when possible (indicated by a faded edge). If no such genes with physical  
641 coordinates are known, the outermost gene known to lie inside the deletion was used as the  
642 boundary (indicated by a sharp edge). Gene names are coloured according to the deficiency  
643 under which the alleles were mapped. Genes names assigned to alleles that did not map under  
644 any of the tested deficiencies are highlighted in grey. *top-3* and *bckd-1A* on chromosome III are  
645 represented by multiple complementation groups with conflicting results from deficiency  
646 mapping.

647

648 **Figure 2** Biological Process GO terms overrepresented in the set of 58 identified essential genes.  
649 Bar length represents the number of genes in the set associated with each GO term.  
650 Overrepresentation was analyzed using PANTHER version 16.0 (Thomas *et al.* 2003) and p-values  
651 were adjusted with the Bonferroni multiple testing correction. Results were filtered to include  
652 terms with adjusted  $p < 0.05$  and edited to exclude redundant terms.

653

654 **Figure 3** Embryonic arrest visualized with DIC microscopy for select maternal-effect lethal  
655 mutants. Eggs were dissected from homozygous mutants and imaged immediately (A) or  
656 incubated in distilled water overnight before imaging (B, C, and D). (A) Eggs dissected from *dgtr-*

657 *1(t2043)* homozygotes exhibit signs of an osmotic integrity defect, by filling the eggshell  
658 completely. (B) *dlat-1(t2035)* embryos exhibit early embryonic arrest, with most embryos  
659 consisting of four cells or less. (C) *ZK688.9(t1433)* embryos arrest with approximately 100 cells.  
660 (D) Terminal embryos of *nstp-2(t1835)* have a lumpy body wall morphology and constricted  
661 nose; most animals were moving inside the eggshell but did not hatch. All scale bars represent  
662 10  $\mu\text{m}$ .  
663

- 664 LITERATURE CITED
- 665
- 666 Altschul, S. F., W. Gish, W. Miller, E. W. Myers and D. J. Lipman, 1990 Basic local alignment
- 667 search tool. *J. Mol. Biol.* 215: 403-410.
- 668 Au, V., E. Li-Leger, G. Raymant, S. Flibotte, G. Chen *et al.*, 2019 CRISPR/Cas9 methodology for the
- 669 generation of knockout deletions in *Caenorhabditis elegans*. *G3: Genes, Genomes, Genet.* 9: 135-
- 670 144.
- 671 Ausländer, S., D. Ausländer and M. Fussenegger, 2017 Synthetic biology—the synthesis of
- 672 biology. *Angew. Chem. Int. Ed.* 56: 6396-6419.
- 673 Bao, Z., J. I. Murray, T. Boyle, S. L. Ooi, M. J. Sandel *et al.*, 2006 Automated cell lineage tracing in
- 674 *Caenorhabditis elegans*. *Proc. Natl. Acad. Sci. U.S.A.* 103: 2707-2712.
- 675 Benenati, G., S. Penkov, T. Müller-Reichert, E. V. Entchev and T. V. Kurzchalia, 2009 Two
- 676 cytochrome P450s in *Caenorhabditis elegans* are essential for the organization of eggshell,
- 677 correct execution of meiosis and the polarization of embryo. *Mech. Dev.* 126: 382-393.
- 678 Bischoff, M., and R. Schnabel, 2006 A posterior centre establishes and maintains polarity of the
- 679 *Caenorhabditis elegans* embryo by a Wnt-dependent relay mechanism. *PLoS Biol.* 4: e396.
- 680 Blumenstiel, J. P., A. C. Noll, J. A. Griffiths, A. G. Perera, K. N. Walton *et al.*, 2009 Identification of
- 681 EMS-induced mutations in *Drosophila melanogaster* by whole-genome sequencing.
- 682 *Genetics* 182: 25-32.
- 683 Boeck, M. E., C. Huynh, L. Gevirtzman, O. A. Thompson, G. Wang *et al.*, 2016 The time-resolved
- 684 transcriptome of *C. elegans*. *Genome Res.* 26: 1441-1450.

685 Bradley, A., K. Anastassiadis, A. Ayadi, J. F. Battey, C. Bell *et al.*, 2012 The mammalian gene  
686 function resource: The international knockout mouse consortium. *Mammalian genome* 23: 580-  
687 586.

688 Brauchle, M., K. Baumer and P. Gönczy, 2003 Differential activation of the DNA replication  
689 checkpoint contributes to asynchrony of cell division in *C. elegans* embryos. *Curr. Biol.* 13: 819-  
690 827.

691 Brenner, S., 1974 The genetics of *Caenorhabditis elegans*. *Genetics* 77: 71-94.

692 Bürglin, T. R., E. Lobos and M. L. Blaxter, 1998 *Caenorhabditis elegans* as a model for parasitic  
693 nematodes. *Int. J. Parasitol.* 28: 395-411.

694 *C. elegans* Deletion Mutant Consortium, 2012 Large-scale screening for targeted knockouts in  
695 the *Caenorhabditis elegans* genome. *G3: Genes, Genomes, Genet.* 2: 1415-1425.

696 Carvalho, A., S. K. Olson, E. Gutierrez, K. Zhang, L. B. Noble *et al.*, 2011 Acute drug treatment in  
697 the early *C. elegans* embryo. *PloS one* 6: e24656.

698 Clark, D. V., T. M. Rogalski, L. M. Donati and D. L. Baillie, 1988 The *unc-22* (IV) region of  
699 *Caenorhabditis elegans*: Genetic analysis of lethal mutations. *Genetics* 119: 345-353.

700 Cockell, M. M., K. Baumer and P. Gönczy, 2004 *Lis-1* is required for dynein-dependent cell  
701 division processes in *C. elegans* embryos. *J. Cell. Sci.* 117: 4571-4582.

702 Culetto, E., and D. B. Sattelle, 2000 A role for *Caenorhabditis elegans* in understanding the  
703 function and interactions of human disease genes. *Hum. Mol. Genet.* 9: 869-877.

- 704 del Castillo-Olivares, A., M. Kulkarni and H. E. Smith, 2009 Regulation of sperm gene expression  
705 by the GATA factor ELT-1. *Dev. Biol.* 333: 397-408.
- 706 Delattre, M., S. Leidel, K. Wani, K. Baumer, J. Bamat *et al.*, 2004 Centriolar SAS-5 is required for  
707 centrosome duplication in *C. elegans*. *Nat. Cell Biol.* 6: 656-664.
- 708 Denver, D. R., K. Morris, M. Lynch and W. K. Thomas, 2004 High mutation rate and  
709 predominance of insertions in the *Caenorhabditis elegans* nuclear genome. *Nature* 430: 679-682.
- 710 Dickerson, J. E., A. Zhu, D. L. Robertson and K. E. Hentges, 2011 Defining the role of essential  
711 genes in human disease. *PloS one* 6: e27368.
- 712 Doitsidou, M., R. J. Poole, S. Sarin, H. Bigelow and O. Hobert, 2010 *C. elegans* mutant  
713 identification with a one-step whole-genome-sequencing and SNP mapping strategy. *PloS*  
714 *one* 5: e15435.
- 715 Doyle, M. A., R. B. Gasser, B. J. Woodcroft, R. S. Hall and S. A. Ralph, 2010 Drug target prediction  
716 and prioritization: Using orthology to predict essentiality in parasite genomes. *BMC*  
717 *Genomics* 11: 222.
- 718 Feichtinger, R. E., 1995 *Quantitative Analysis of Maternal Gene Functions of Caenorhabditis*  
719 *Elegans*. Ph.D. Thesis, University of Vienna, Austria.
- 720 Fire, A., S. Xu, M. K. Montgomery, S. A. Kostas, S. E. Driver *et al.*, 1998 Potent and specific genetic  
721 interference by double-stranded RNA in *Caenorhabditis elegans*. *Nature* 391: 806-811.
- 722 Flibotte, S., M. L. Edgley, I. Chaudhry, J. Taylor, S. E. Neil *et al.*, 2010 Whole-genome profiling of  
723 mutagenesis in *Caenorhabditis elegans*. *Genetics* 185: 431-441.



724 Fraser, A. G., R. S. Kamath, P. Zipperlen, M. Martinez-Campos, M. Sohrmann *et al.*, 2000  
725 Functional genomic analysis of *C. elegans* chromosome I by systematic RNA interference.  
726 Nature 408: 325-330.

727 Georgi, B., B. F. Voight and M. Bućan, 2013 From mouse to human: Evolutionary genomics  
728 analysis of human orthologs of essential genes. PLoS genet. 9: e1003484.

729 Gerstein, M. B., J. Rozowsky, K. Yan, D. Wang, C. Cheng *et al.*, 2014 Comparative analysis of the  
730 transcriptome across distant species.  
731 512: 445-448.

732 Gerstein, M. B., Z. J. Lu, E. L. Van Nostrand, C. Cheng, B. I. Arshinoff *et al.*, 2010 Integrative  
733 analysis of the *Caenorhabditis elegans* genome by the modENCODE project. Science 330: 1775-  
734 1787.

735 Giaever, G., A. M. Chu, L. Ni, C. Connelly, L. Riles *et al.*, 2002 Functional profiling of the  
736 *Saccharomyces cerevisiae* genome. Nature 418: 387-391.

737 Gönczy, P., H. Schnabel, T. Kaletta, A. D. Amores, T. Hyman *et al.*, 1999 Dissection of cell division  
738 processes in the one cell stage *Caenorhabditis elegans* embryo by mutational analysis. J. Cell  
739 Biol. 144: 927-946.

740 Gönczy, P., J. Bellanger, M. Kirkham, A. Pozniakowski, K. Baumer *et al.*, 2001 Zyg-8, a gene  
741 required for spindle positioning in *C. elegans*, encodes a doublecortin-related kinase that  
742 promotes microtubule assembly. Dev. Cell. 1: 363-375.

743 Gönczy, P., C. Echeverri, K. Oegema, A. Coulson, S. J. Jones *et al.*, 2000 Functional genomic  
744 analysis of cell division in *C. elegans* using RNAi of genes on chromosome III. *Nature* 408: 331-  
745 336.

746 Goodwin, S., J. D. McPherson and W. R. McCombie, 2016 Coming of age: Ten years of next-  
747 generation sequencing technologies. *Nat. Rev. Genet.* 17: 333.

748 Green, R. A., H. Kao, A. Audhya, S. Arur, J. R. Mayers *et al.*, 2011 A high-resolution *C. elegans*  
749 essential gene network based on phenotypic profiling of a complex tissue. *Cell* 145: 470-482.

750 Hashmi, S., W. Tawe and S. Lustigman, 2001 *Caenorhabditis elegans* and the study of gene  
751 function in parasites. *Trends Parasitol.* 17: 387-393.

752 Herman, R. K., 1978 Crossover suppressors and balanced recessive lethals in *Caenorhabditis*  
753 *elegans*. *Genetics* 88: 49-65.

754 Hillier, L. W., V. Reinke, P. Green, M. Hirst, M. A. Marra *et al.*, 2009 Massively parallel sequencing  
755 of the polyadenylated transcriptome of *C. elegans*. *Genome Res.* 19: 657-666.

756 Hillier, L. W., G. T. Marth, A. R. Quinlan, D. Dooling, G. Fewell *et al.*, 2008 Whole-genome  
757 sequencing and variant discovery in *C. elegans*. *Nat. Methods* 5: 183.

758 Hotez, P. J., P. J. Brindley, J. M. Bethony, C. H. King, E. J. Pearce *et al.*, 2008 Helminth infections:  
759 The great neglected tropical diseases. *J. Clin. Invest.* 118: 1311-1321.

760 Howell, A. M., S. G. Gilmour, R. A. Mancebo and A. M. Rose, 1987 Genetic analysis of a large  
761 autosomal region in *Caenorhabditis elegans* by the use of a free duplication. *Genetics*  
762 *Research* 49: 207-213.

- 763 Howell, A. M., and A. M. Rose, 1990 Essential genes in the hDf6 region of chromosome I in  
764 *Caenorhabditis elegans*. *Genetics* 126: 583-592.
- 765 Hughes, T. R., 2002 Yeast and drug discovery. *Funct. Integr. Genomics* 2: 199-211.
- 766 Hutter, H., and J. Suh, 2016 GExplore 1.4: An expanded web interface for queries on  
767 *Caenorhabditis elegans* protein and gene function. *Worm* 5: e1234659.
- 768 Hutter, H., M. Ng and N. Chen, 2009 GExplore: A web server for integrated queries of protein  
769 domains, gene expression and mutant phenotypes. *BMC Genomics* 10: 529.
- 770 Jabbar, A., Z. Iqbal, D. Kerboeuf, G. Muhammad, M. N. Khan *et al.*, 2006 Anthelmintic resistance:  
771 The state of play revisited. *Life Sci.* 79: 2413-2431.
- 772 Jaramillo-Lambert, A., A. S. Fuchsman, A. S. Fabritius, H. E. Smith and A. Golden, 2015 Rapid and  
773 efficient identification of *Caenorhabditis elegans* legacy mutations using Hawaiian SNP-based  
774 mapping and whole-genome sequencing. *G3: Genes, Genomes, Genet.* 5: 1007-1019.
- 775 Johnsen, R. C., and D. L. Baillie, 1997 Mutation, pp. 79-95 in *C. Elegans II*, edited by Riddle, D.L.,  
776 Blumenthal, T., Meyer, B.J., Priess, J.R. Cold Spring Harbor Laboratory Press, Cold Spring Harbor  
777 (NY).
- 778 Johnsen, R. C., and D. L. Baillie, 1991 Genetic analysis of a major segment [LGV (left)] of the  
779 genome of *Caenorhabditis elegans*. *Genetics* 129: 735-752.
- 780 Johnsen, R. C., and D. L. Baillie, 1988 Formaldehyde mutagenesis of the eT1 balanced region in  
781 *Caenorhabditis elegans*: Dose—response curve and the analysis of mutational events. *Mutat.*  
782 *Res.* 201: 137-147.

- 783 Johnston, W. L., A. Krizus and J. W. Dennis, 2006 The eggshell is required for meiotic fidelity,  
784 polar-body extrusion and polarization of the *C. elegans* embryo. *BMC biology* 4: 35.
- 785 Jordan, I. K., I. B. Rogozin, Y. I. Wolf and E. V. Koonin, 2002 Essential genes are more  
786 evolutionarily conserved than are nonessential genes in bacteria. *Genome Res.* 12: 962-968.
- 787 Kadandale, P., I. Chatterjee and A. Singson, 2009 Germline transformation of *Caenorhabditis*  
788 *elegans* by injection, pp. 123-133 in *Microinjection*. Springer.
- 789 Kaitna, S., H. Schnabel, R. Schnabel, A. A. Hyman and M. Glotzer, 2002 A ubiquitin C-terminal  
790 hydrolase is required to maintain osmotic balance and execute actin-dependent processes in the  
791 early *C. elegans* embryo. *J. Cell. Sci.* 115: 2293-2302.
- 792 Kamath, R. S., A. G. Fraser, Y. Dong, G. Poulin, R. Durbin *et al.*, 2003 Systematic functional  
793 analysis of the *Caenorhabditis elegans* genome using RNAi. *Nature* 421: 231-237.
- 794 Kemphues, K. J., M. Kusch and N. Wolf, 1988 Maternal-effect lethal mutations on linkage group II  
795 of *Caenorhabditis elegans*. *Genetics* 120: 977-986.
- 796 Kim, W., R. S. Underwood, I. Greenwald and D. D. Shaye, 2018 OrthoList 2: A new comparative  
797 genomic analysis of human and *Caenorhabditis elegans* genes. *Genetics* 210: 445-461.
- 798 Kniazeva, M., Q. T. Crawford, M. Seiber, C. Wang and M. Han, 2004 Monomethyl branched-chain  
799 fatty acids play an essential role in *Caenorhabditis elegans* development. *PLoS biology* 2: e257.
- 800 Kumar, S., K. Chaudhary, J. M. Foster, J. F. Novelli, Y. Zhang *et al.*, 2007 Mining predicted  
801 essential genes of *Brugia malayi* for nematode drug targets. *PloS one* 2: e1189.

- 802 Li, H., and R. Durbin, 2009 Fast and accurate short read alignment with Burrows–Wheeler  
803 transform. *Bioinformatics* 25: 1754-1760.
- 804 Li, H., B. Handsaker, A. Wysoker, T. Fennell, J. Ruan *et al.*, 2009 The sequence alignment/map  
805 format and SAMtools. *Bioinformatics* 25: 2078-2079.
- 806 Li, Z., F. J. Vizeacoumar, S. Bahr, J. Li, J. Warringer *et al.*, 2011 Systematic exploration of essential  
807 yeast gene function with temperature-sensitive mutants. *Nat. Biotechnol.* 29: 361.
- 808 Ma, X., Y. Zhu, C. Li, P. Xue, Y. Zhao *et al.*, 2014 Characterisation of *Caenorhabditis elegans* sperm  
809 transcriptome and proteome. *BMC Genomics* 15: 168.
- 810 McKim, K. S., M. F. Heschl, R. E. Rosenbluth and D. L. Baillie, 1988 Genetic organization of the  
811 *unc-60* region in *Caenorhabditis elegans*. *Genetics* 118: 49-59.
- 812 McKim, K. S., T. Starr and A. M. Rose, 1992 Genetic and molecular analysis of the *dpy-14* region  
813 in *Caenorhabditis elegans*. *Mol. Gen. Genet.* 233: 241-251.
- 814 Mello, C. C., J. M. Kramer, D. Stinchcomb and V. Ambros, 1991 Efficient gene transfer in *C.*  
815 *elegans*: Extrachromosomal maintenance and integration of transforming sequences. *EMBO*  
816 *J.* 10: 3959-3970.
- 817 Meneely, P. M., and R. K. Herman, 1979 Lethals, steriles and deficiencies in a region of the X  
818 chromosome of *Caenorhabditis elegans*. *Genetics* 92: 99-115.
- 819 Metzker, M. L., 2010 Sequencing technologies—the next generation. *Nat. Rev. Genet.* 11: 31-46.

- 820 Nicol, J. M., S. J. Turner, D. L. Coyne, L. Den Nijs, S. Hockland *et al.*, 2011 Current nematode  
821 threats to world agriculture, pp. 21-43 in *Genomics and Molecular Genetics of Plant-Nematode*  
822 *Interactions*. Springer.
- 823 Nieto, C., J. Almendinger, S. Gysi, E. Gómez-Orte, A. Kaech *et al.*, 2010 Ccz-1 mediates the  
824 digestion of apoptotic corpses in *C. elegans*. *J. Cell. Sci.* 123: 2001-2007.
- 825 Nordström, K. J., M. C. Albani, G. V. James, C. Gutjahr, B. Hartwig *et al.*, 2013 Mutation  
826 identification by direct comparison of whole-genome sequencing data from mutant and wild-  
827 type individuals using k-mers. *Nat. Biotechnol.* 31: 325.
- 828 Norris, A. D., H. Kim, M. P. Colaiacovo and J. A. Calarco, 2015 Efficient genome editing in  
829 *Caenorhabditis elegans* with a toolkit of dual-marker selection cassettes. *Genetics* 201: 449-58.
- 830 Olson, S. K., G. Greenan, A. Desai, T. Müller-Reichert and K. Oegema, 2012 Hierarchical assembly  
831 of the eggshell and permeability barrier in *C. elegans*. *J. Cell Biol.* 198: 731-748.
- 832 Packer, J. S., Q. Zhu, C. Huynh, P. Sivaramakrishnan, E. Preston *et al.*, 2019 A lineage-resolved  
833 molecular atlas of *C. elegans* embryogenesis at single-cell resolution. *Science* 365: eaax1971.
- 834 Qin, Z., R. Johnsen, S. Yu, J. S. Chu, D. L. Baillie *et al.*, 2018 Genomic identification and functional  
835 characterization of essential genes in *Caenorhabditis elegans*. *G3: Genes, Genomes,*  
836 *Genet.* 8: 981-997.
- 837 Rahman, M. M., S. Rosu, D. Joseph-Strauss and O. Cohen-Fix, 2014 Down-regulation of  
838 tricarboxylic acid (TCA) cycle genes blocks progression through the first mitotic division in  
839 *Caenorhabditis elegans* embryos. *Proc. Natl. Acad. Sci. U.S.A.* 111: 2602-2607.

840 Rappleye, C. A., A. Tagawa, N. Le Bot, J. Ahringer and R. V. Aroian, 2003 Involvement of fatty acid  
841 pathways and cortical interaction of the pronuclear complex in *Caenorhabditis elegans*  
842 embryonic polarity. *BMC developmental biology* 3: 8.

843 Rappleye, C. A., A. R. Paredez, C. W. Smith, K. L. McDonald and R. V. Aroian, 1999 The coronin-  
844 like protein POD-1 is required for anterior–posterior axis formation and cellular architecture in  
845 the nematode *Caenorhabditis elegans*. *Genes Dev.* 13: 2838-2851.

846 Reinke, V., I. San Gil, S. Ward and K. Kazmer, 2004 Genome-wide germline-enriched and sex-  
847 biased expression profiles in *Caenorhabditis elegans*. *Development* 131: 311-323.

848 Rogalski, T. M., D. G. Moerman and D. L. Baillie, 1982 Essential genes and deficiencies in the unc-  
849 22 IV region of *Caenorhabditis elegans*. *Genetics* 102: 725-736.

850 Sarin, S., S. Prabhu, M. M. O'meara, I. Pe'er and O. Hobert, 2008 *Caenorhabditis elegans* mutant  
851 allele identification by whole-genome sequencing. *Nat. Methods* 5: 865-867.

852 Schnabel, R., H. Hutter, D. Moerman and H. Schnabel, 1997 Assessing normal embryogenesis in  
853 *Caenorhabditis elegans* using a 4D microscope: Variability of development and regional  
854 specification. *Dev. Biol.* 184: 234-265.

855 Schneeberger, K., and D. Weigel, 2011 Fast-forward genetics enabled by new sequencing  
856 technologies. *Trends Plant Sci.* 16: 282-288.

857 Schneeberger, K., S. Ossowski, C. Lanz, T. Juul, A. H. Petersen *et al.*, 2009 SHOREmap:  
858 Simultaneous mapping and mutation identification by deep sequencing. *Nat. Methods* 6: 550-  
859 551.

860 Shi, J., E. Wang, J. P. Milazzo, Z. Wang, J. B. Kinney *et al.*, 2015 Discovery of cancer drug targets  
861 by CRISPR-Cas9 screening of protein domains. *Nat. Biotechnol.* 33: 661-667.

862 Silverman, G. A., C. J. Luke, S. R. Bhatia, O. S. Long, A. C. Vetica *et al.*, 2009 Modeling molecular  
863 and cellular aspects of human disease using the nematode *Caenorhabditis elegans*. *Pediatr.*  
864 *Res.* 65: 10-18.

865 Smith, D. R., A. R. Quinlan, H. E. Peckham, K. Makowsky, W. Tao *et al.*, 2008 Rapid whole-genome  
866 mutational profiling using next-generation sequencing technologies. *Genome Res.* 18: 1638-  
867 1642.

868 Smith, H. E., A. S. Fabritius, A. Jaramillo-Lambert and A. Golden, 2016 Mapping challenging  
869 mutations by whole-genome sequencing. *G3: Genes, Genomes, Genet.* 6: 1297-1304.

870 Sonnevile, R., and P. Gönczy, 2004 Zyg-11 and cul-2 regulate progression through meiosis II and  
871 polarity establishment in *C. elegans*. *Development* 131: 3527-3543.

872 Sönnichsen, B., L. B. Koski, A. Walsh, P. Marschall, B. Neumann *et al.*, 2005 Full-genome RNAi  
873 profiling of early embryogenesis in *Caenorhabditis elegans*. *Nature* 434: 462-469.

874 Srivatsan, A., Y. Han, J. Peng, A. K. Tehranchi, R. Gibbs *et al.*, 2008 High-precision, whole-genome  
875 sequencing of laboratory strains facilitates genetic studies. *PLoS Genet.* 4: e1000139.

876 Stein, K. K., and A. Golden, 2018 The *C. elegans* eggshell in *WormBook: The Online Review of C.*  
877 *Elegans Biology*. The *C. elegans* Research Community.



- 878 Stewart, H. I., N. J. O'Neil, D. L. Janke, N. W. Franz, H. M. Chamberlin *et al.*, 1998 Lethal mutations  
879 defining 112 complementation groups in a 4.5 mb sequenced region of *Caenorhabditis elegans*  
880 chromosome III. *MGG* 260: 280-288.
- 881 The *C. elegans* Sequencing Consortium, 1998 Genome sequence of the nematode *C. elegans*: A  
882 platform for investigating biology. *Science* 2012-2018.
- 883 Thomas, C., P. DeVries, J. Hardin and J. White, 1996 Four-dimensional imaging: Computer  
884 visualization of 3D movements in living specimens. *Science* 273: 603-607.
- 885 Thomas, P. D., M. J. Campbell, A. Kejariwal, H. Mi, B. Karlak *et al.*, 2003 PANTHER: A library of  
886 protein families and subfamilies indexed by function. *Genome Res.* 13: 2129-2141.
- 887 Thompson, O., M. Edgley, P. Strasbourger, S. Flibotte, B. Ewing *et al.*, 2013 The million mutation  
888 project: A new approach to genetics in *Caenorhabditis elegans*. *Genome Res.* 23: 1749-1762.
- 889 Tintori, S. C., E. O. Nishimura, P. Golden, J. D. Lieb and B. Goldstein, 2016 A transcriptional  
890 lineage of the early *C. elegans* embryo. *Dev. Cell* 38: 430-444.
- 891 Varshney, G. K., J. Lu, D. E. Gildea, H. Huang, W. Pei *et al.*, 2013 A large-scale zebrafish gene  
892 knockout resource for the genome-wide study of gene function. *Genome Res.* 23: 727-735.
- 893 Vatcher, G. P., C. M. Thacker, T. Kaletta, H. Schnabel, R. Schnabel *et al.*, 1998 Serine  
894 hydroxymethyltransferase is maternally essential in *Caenorhabditis elegans*. *J. Biol.*  
895 *Chem.* 273: 6066-6073.
- 896 Vyas, V. K., M. I. Barrasa and G. R. Fink, 2015 A *Candida albicans* CRISPR system permits genetic  
897 engineering of essential genes and gene families. *Sci. Adv.* 1: e1500248.

- 898 Wang, S., S. D. Ochoa, R. N. Khaliullin, A. Gerson-Gurwitz, J. M. Hendel *et al.*, 2019 A high-content  
899 imaging approach to profile *C. elegans* embryonic development. *Development* 146: dev174029.
- 900 Winzeler, E. A., D. D. Shoemaker, A. Astromoff, H. Liang, K. Anderson *et al.*, 1999 Functional  
901 characterization of the *S. cerevisiae* genome by gene deletion and parallel analysis.  
902 *Science* 285: 901-906.
- 903 Wolstenholme, A. J., I. Fairweather, R. Prichard, G. von Samson-Himmelstjerna and N. C.  
904 Sangster, 2004 Drug resistance in veterinary helminths. *Trends Parasitol.* 20: 469-476.
- 905 Yu, L., L. P. Castillo, S. Mnaimneh, T. R. Hughes and G. W. Brown, 2006 A survey of essential gene  
906 function in the yeast cell division cycle. *Mol. Biol. Cell* 17: 4736-4747.
- 907 Zhang, M., C. Wang, T. D. Otto, J. Oberstaller, X. Liao *et al.*, 2018 Uncovering the essential genes  
908 of the human malaria parasite *Plasmodium falciparum* by saturation mutagenesis.  
909 *Science* 360: eaap7847.
- 910 Zhu, G., G. Salazar, S. A. Zlatic, B. Fiza, M. M. Doucette *et al.*, 2009 SPE-39 family proteins interact  
911 with the HOPS complex and function in lysosomal delivery. *Mol. Biol. Cell* 20: 1223-1240.
- 912 Zuryn, S., S. Le Gras, K. Jamet and S. Jarriault, 2010 A strategy for direct mapping and  
913 identification of mutations by whole-genome sequencing. *Genetics* 186: 427-430.
- 914

915 Figure 1.

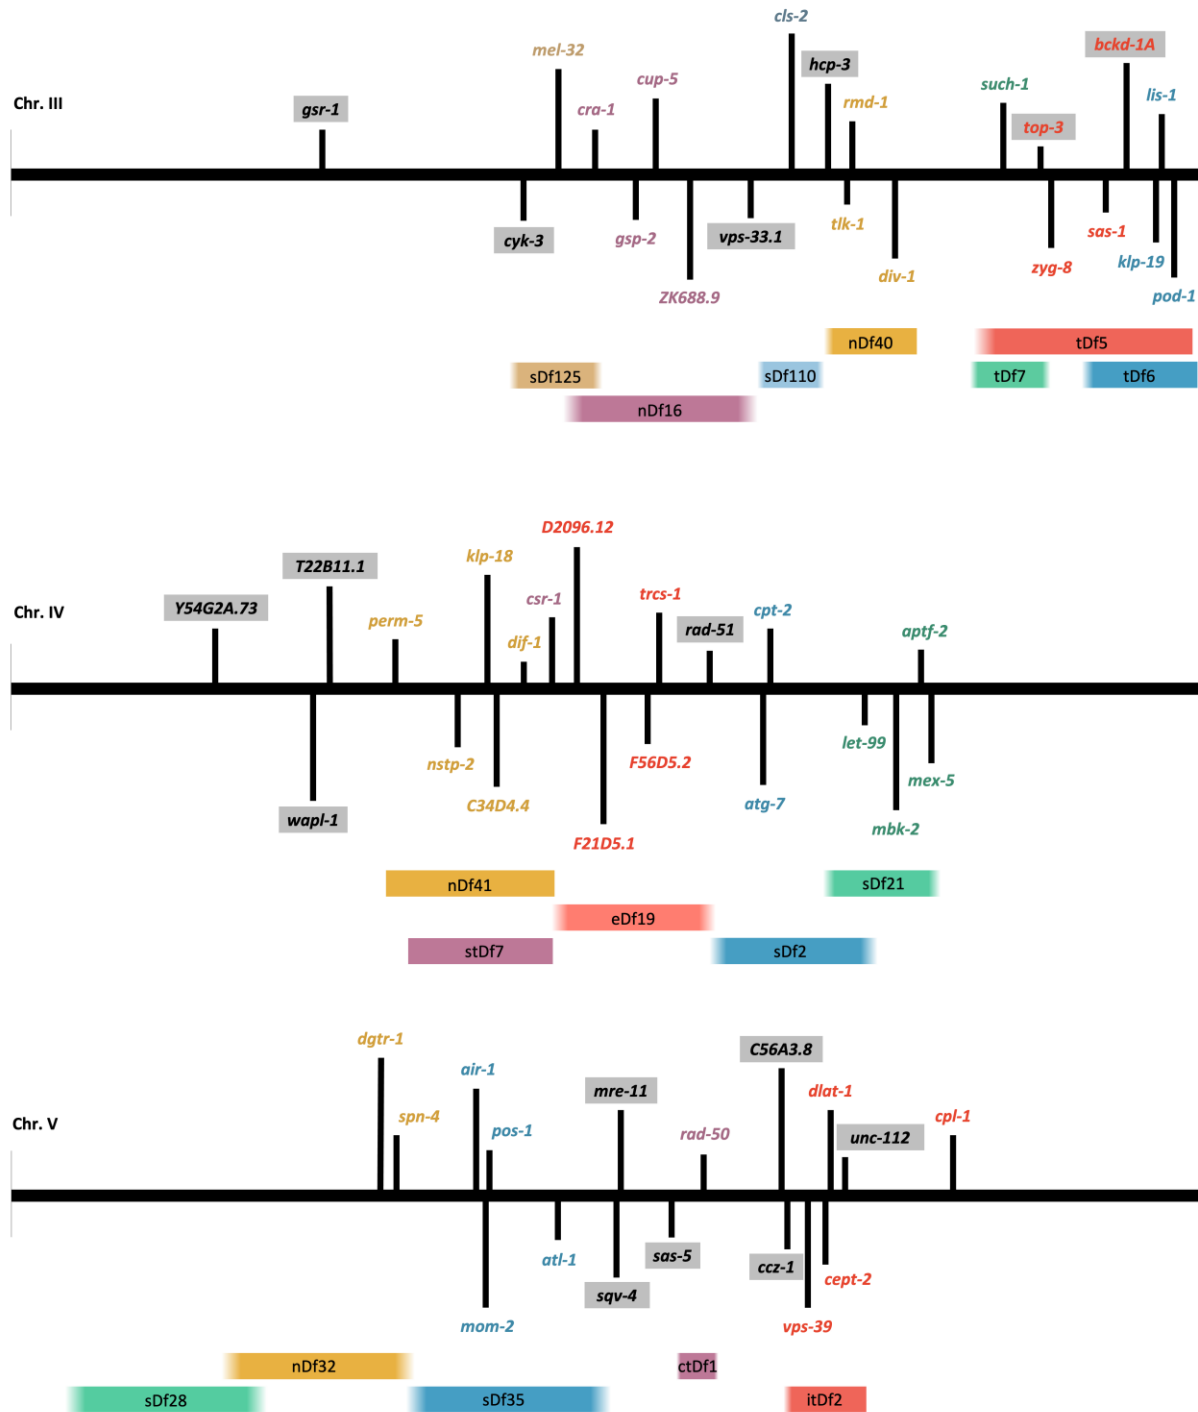

916

917 Figure 2

918

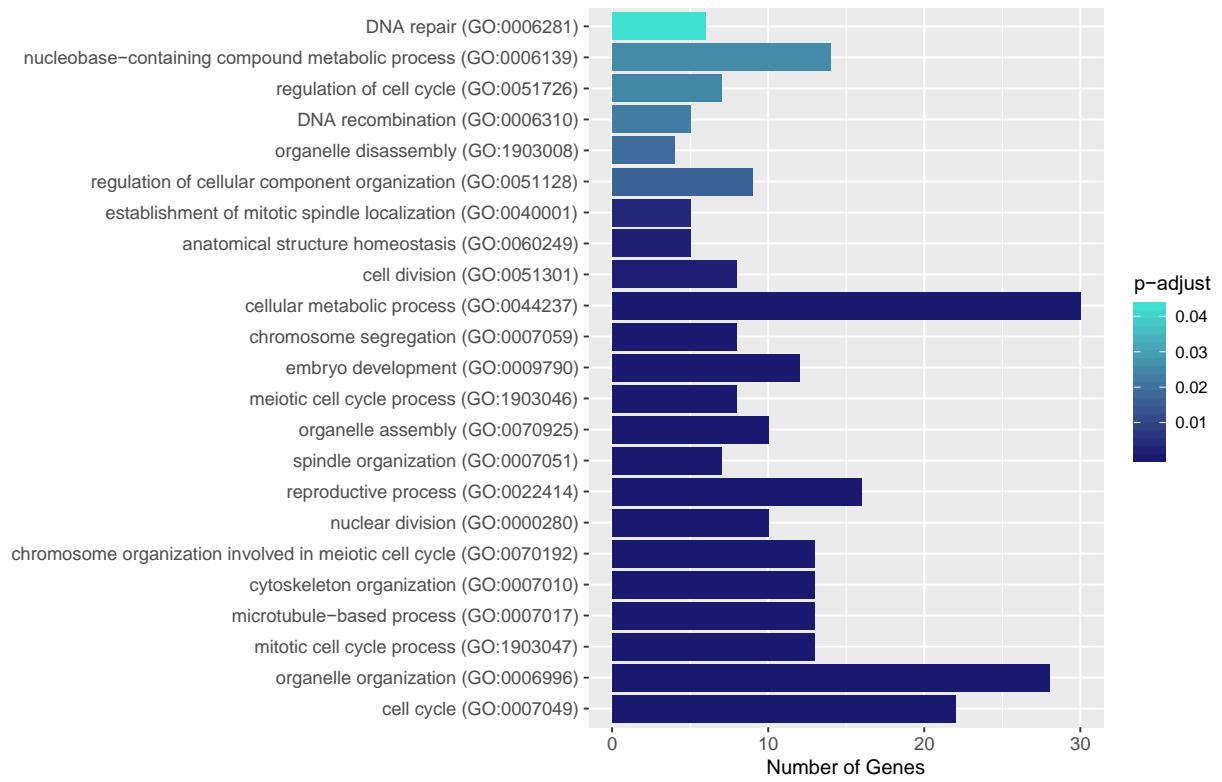

919

920

921

922 Figure 3.

923

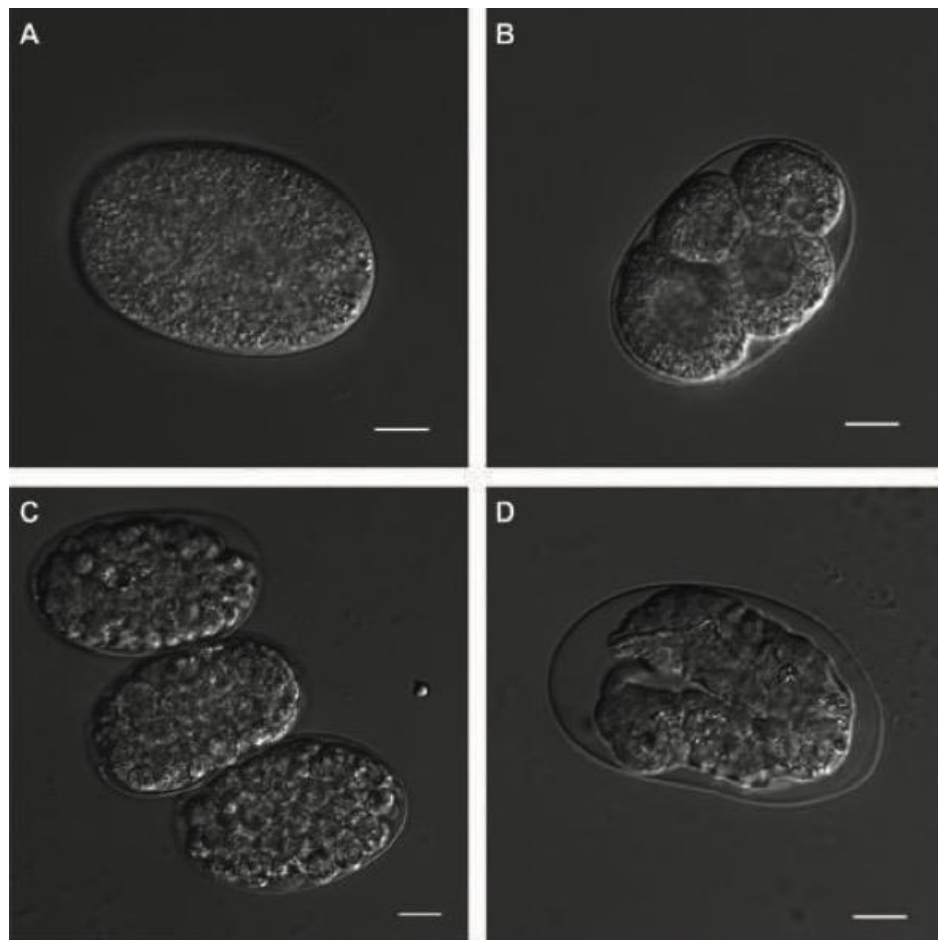

924
